# Supplementary material for: Highly stable blue light-emitting materials with a three-dimensional architecture: improvement of charge injection and electroluminescence performance
Source: Royal Society of Chemistry journal article supplement (doi:10.1039/b9nj00723g), 2010-01-01

# Supporting Information for

## Highly Stable Blue Light-Emitting Materials with a Three-Dimensional Architecture: Improvement of Charge Injections and Electroluminescence Performance

Ting Lei, Jia Luo, Lei Wang, Yuguo Ma, Jian Wang, Yong Cao, and Jian Pei

Beijing National Laboratory for Molecular Sciences (BNLMS) Key Labs of Bioorganic Chemistry and Molecular Engineering and of Polymer Chemistry, College of Chemistry, Peking University, Beijing 100871 and Institute of Polymer Optoelectronic Materials and Devices, and Key Lab of Specially Functional Materials of Ministry of Education Department, South China University of Technology, Guangzhou 510640, China

### Table of Contents

|                                                                                      |     |
|--------------------------------------------------------------------------------------|-----|
| 1. Molecular model of <b>sFCbz</b> .                                                 | S2  |
| 2. UV and PL Spectra of <b>F</b> series                                              | S2  |
| 3. PL Spectra of <b>sFOxd</b> and <b>FOxd</b> at Different Exciting Wavelength       | S3  |
| 4. Cyclic Voltammograms Spectra of <b>F</b> series.                                  | S4  |
| 5. Thermal Properties of the Thin Films.                                             | S4  |
| 6. Surface Morphologies of <b>sFCbz</b> , <b>FCbz</b> , <b>sFOxd</b> and <b>FOxd</b> | S7  |
| 7. J-LE characteristics of double-layer devices                                      | S8  |
| 8. EL spectra stability of <b>sFOxd</b> and <b>sFCbz</b>                             | S9  |
| 9. $^1\text{H}$ and $^{13}\text{C}$ NMR Spectra                                      | S10 |

## 1. Molecular model of sFCbz.

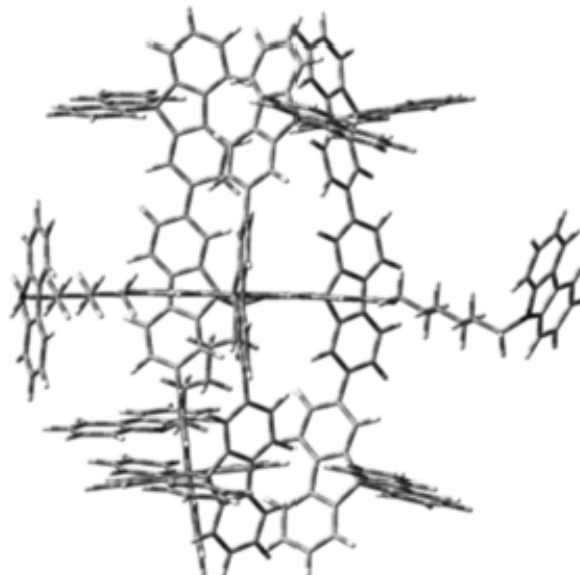

**Figure S1** The energy was minimized at PM3 level using Gaussian 03 packages

## 2. UV and PL Spectra of F series.

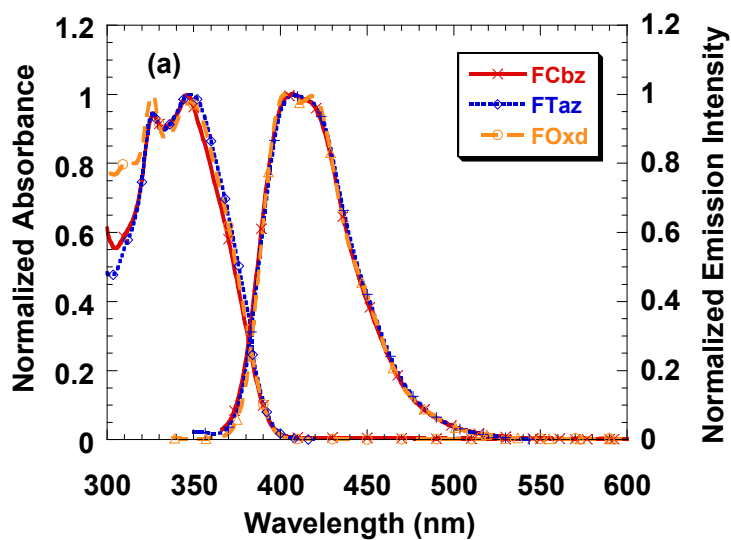

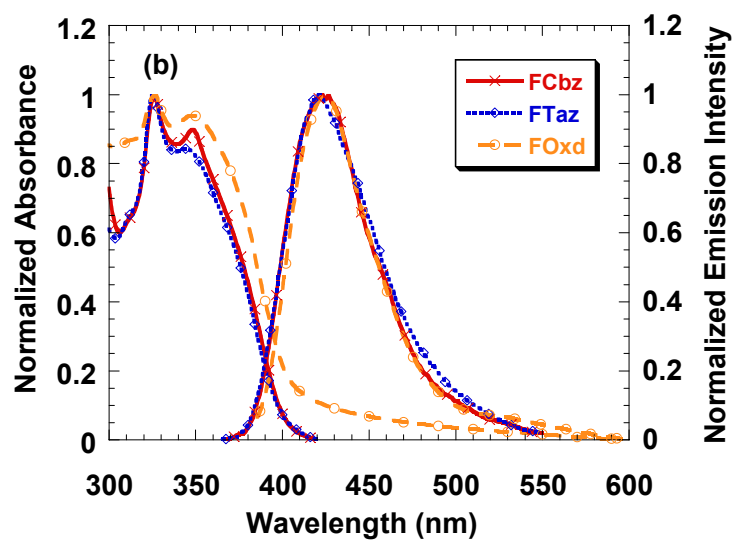

**Figure S2** The normalized absorption and PL spectra of **F** series: (a) in dilute toluene solutions ( $1 \times 10^{-6}$  M); (b) in solid state (spin casting from toluene).

### 3. PL Spectra of sFOxd and FOxd at Different Exciting Wavelength

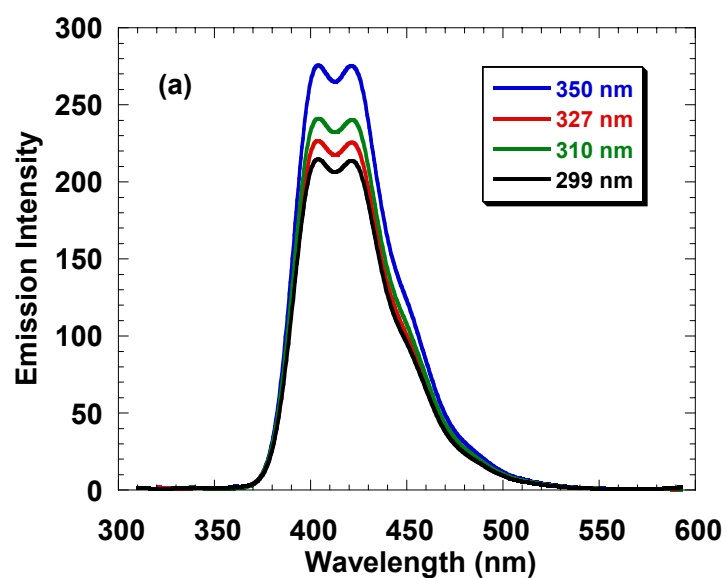

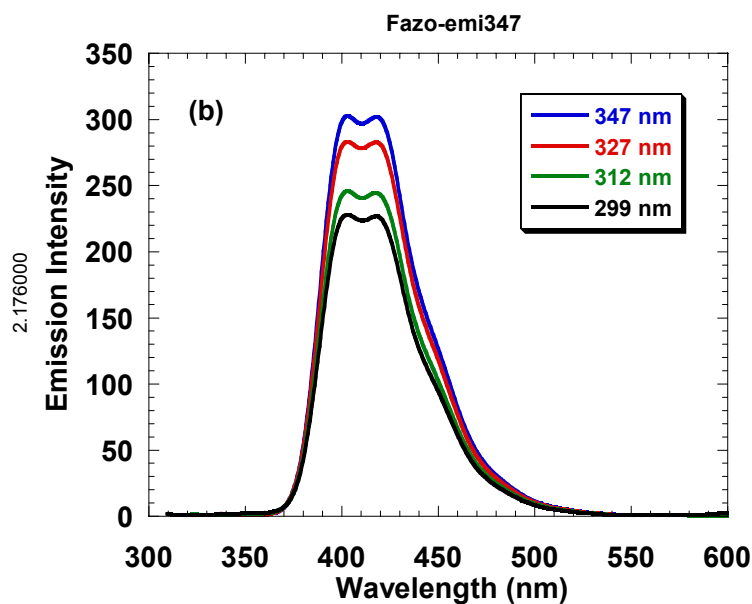

**Figure S3** PL spectra of sFOxd and FOxd at different exciting wavelength (350 nm, 327 nm, 310 nm, 299 nm) in dilute solution ( $1 \times 10^{-6}$  M, toluene). The excitations at the absorption of the **Oxd** groups (299 nm and 310 nm) show completely the emission of the congujaged arms, which indicate the efficient intramolecular energy transfer.

#### 4. Cyclic Voltammograms Spectra of F series.

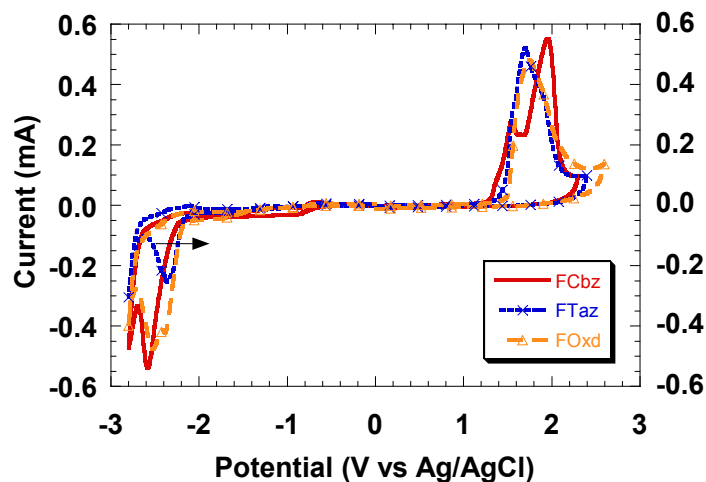

**Figure S4** Cyclic voltammograms of drop-cast films of the F series. Scan rate,  $100 \text{ mV} \cdot \text{s}^{-1}$ ; working electrode, glassy carbon; auxiliary electrode, Pt wire; reference electrode, Ag/AgCl; supporting electrolyte  $n\text{-Bu}_4\text{NPF}_6$  (0.1 M,  $\text{CH}_3\text{CN}$ ). The black arrow indicates the onset changes of the three compounds.

## 5. Thermal Properties .

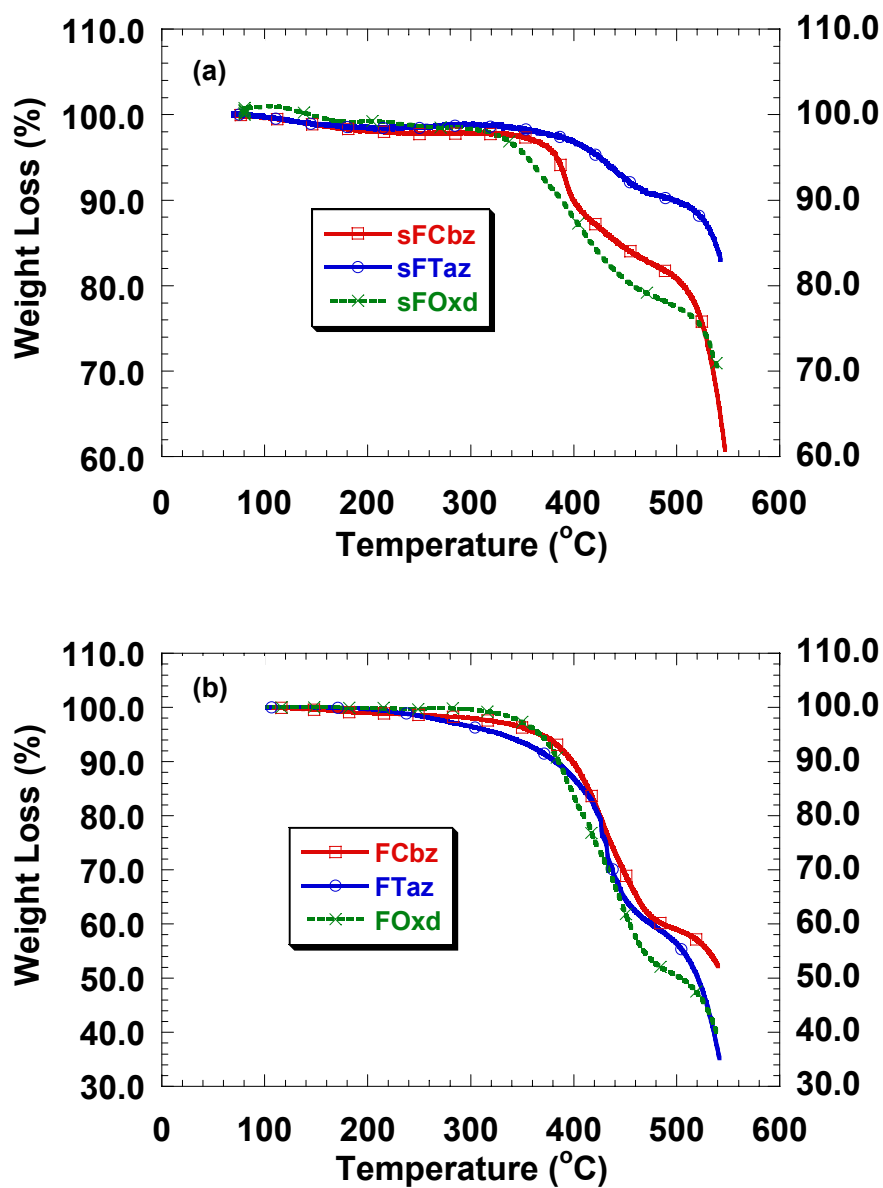

**Figure S5** TGA curves of (a) sF series and (b) F series in nitrogen atmosphere at a heating rate of 10 °C/min.

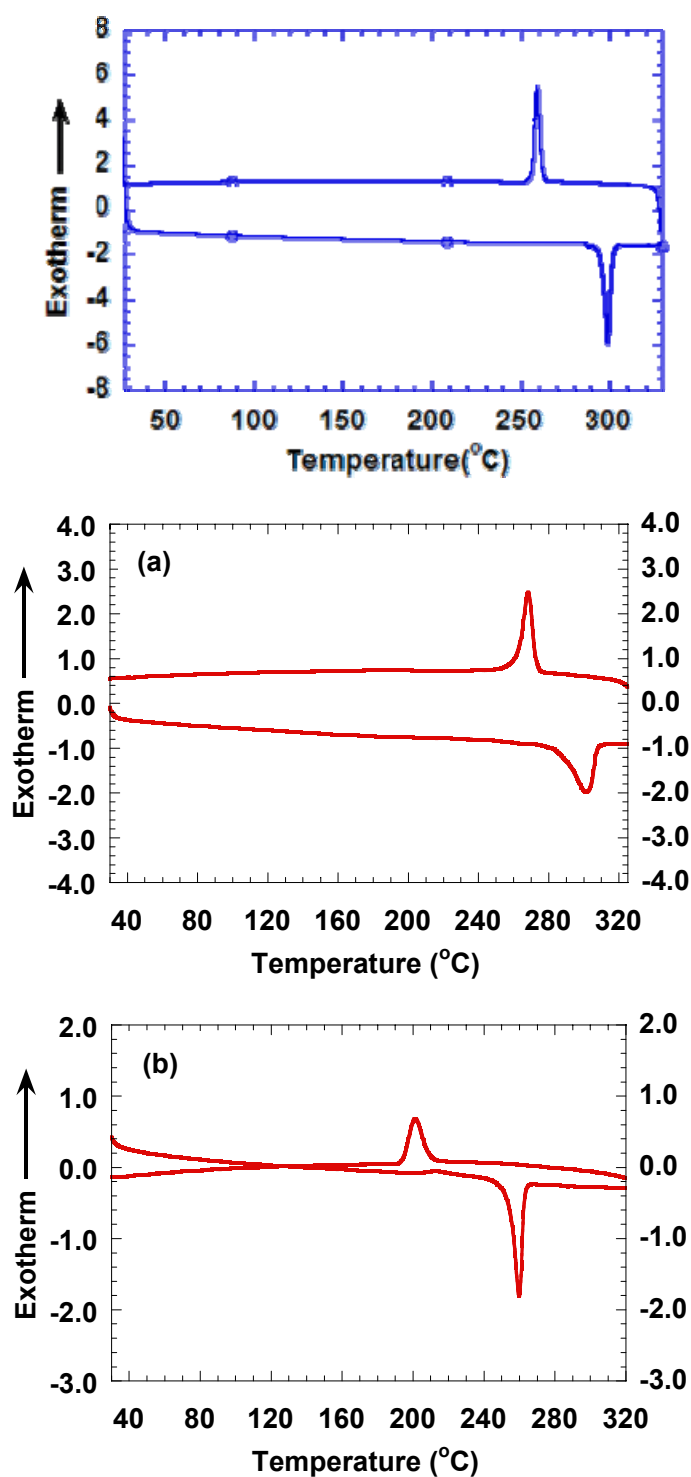

**Figure S6** DSC traces of (a)FCbz , (b) FTazand (c) FOxd recorded at a heating rate of 10 °C min<sup>-1</sup>.

## 6. Surface Morphologies of sFCbz, FCbz, sFOxd and FOxd:

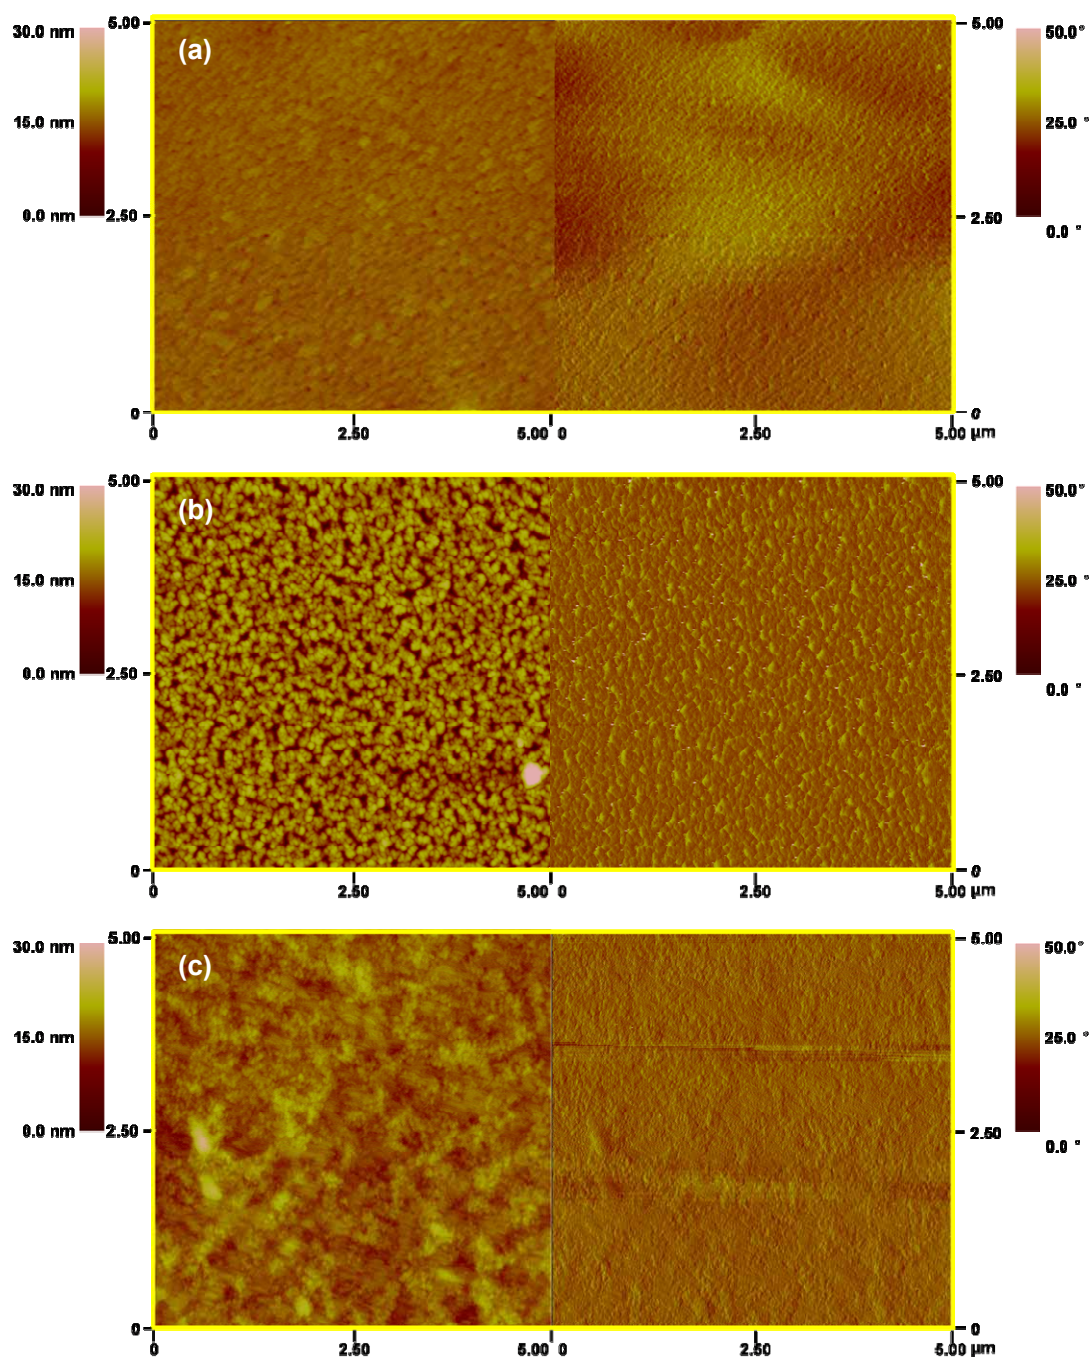

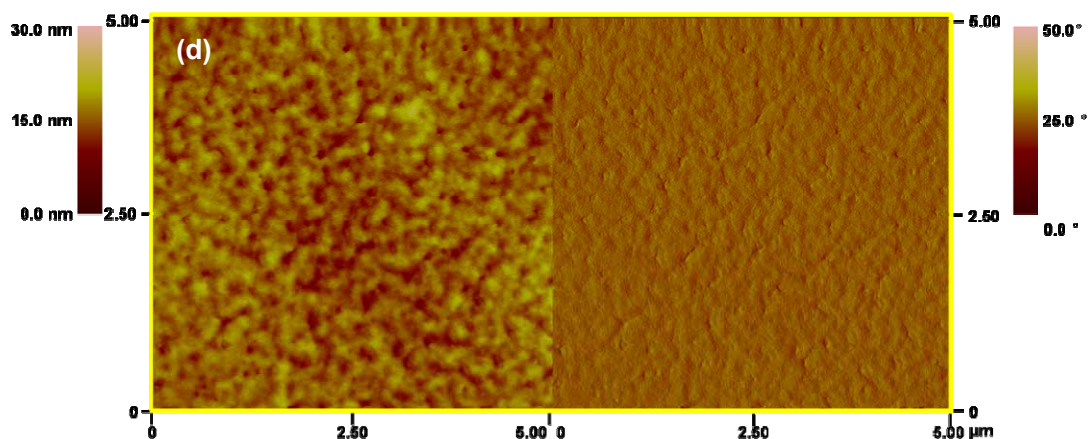

**Figure S7** Tapping-mode AFM height images and phase images of (a) **sFCbz** ( $5 \times 5 \mu\text{m}$ ), (b) **FCbz** ( $5 \times 5 \mu\text{m}$ ), (c) **sFOxd** ( $5 \times 5 \mu\text{m}$ ) and (d) **FOxd** ( $5 \times 5 \mu\text{m}$ ) in thin film (spin-casted on quartz plane from 5 mg/mL toluene solution). As indicated by the height images, the **sF series** exhibit better amorphous morphologies than **F series**. The phase images, which are more sensitive to the grain edges, also show that the **F series** have a strong tendency to crystallize.

## 7. J-LE characteristics of double-layer devices

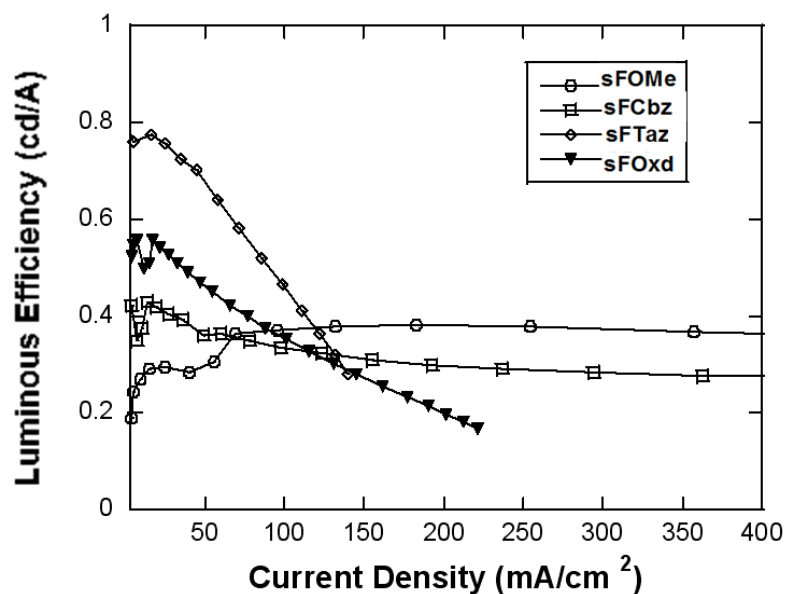

**Figure S8.** J-LE characteristics of double-layer devices: ITO/PEDOT/PVK /EL/Ba/Al.



## 8. EL spectra Stability of compounds **sFCbz** and **sFOxd**

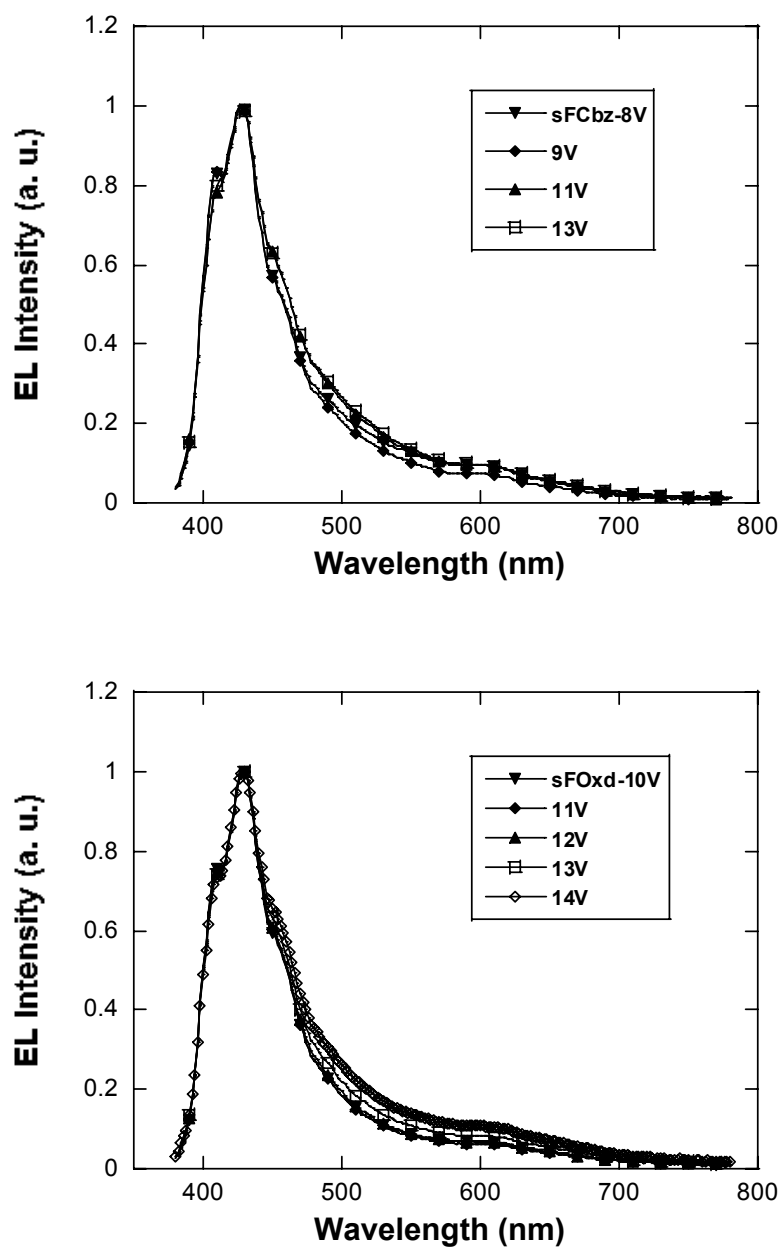

Figure S9 Electroluminescence spectra of **sFCbz** and **sFOxd** with device structure ITO/PEDOT/PVK/EL/Ba/Al under increasing bias.



## 9. $^1\text{H}$ and $^{13}\text{C}$ NMR Spectra

### Compound 9

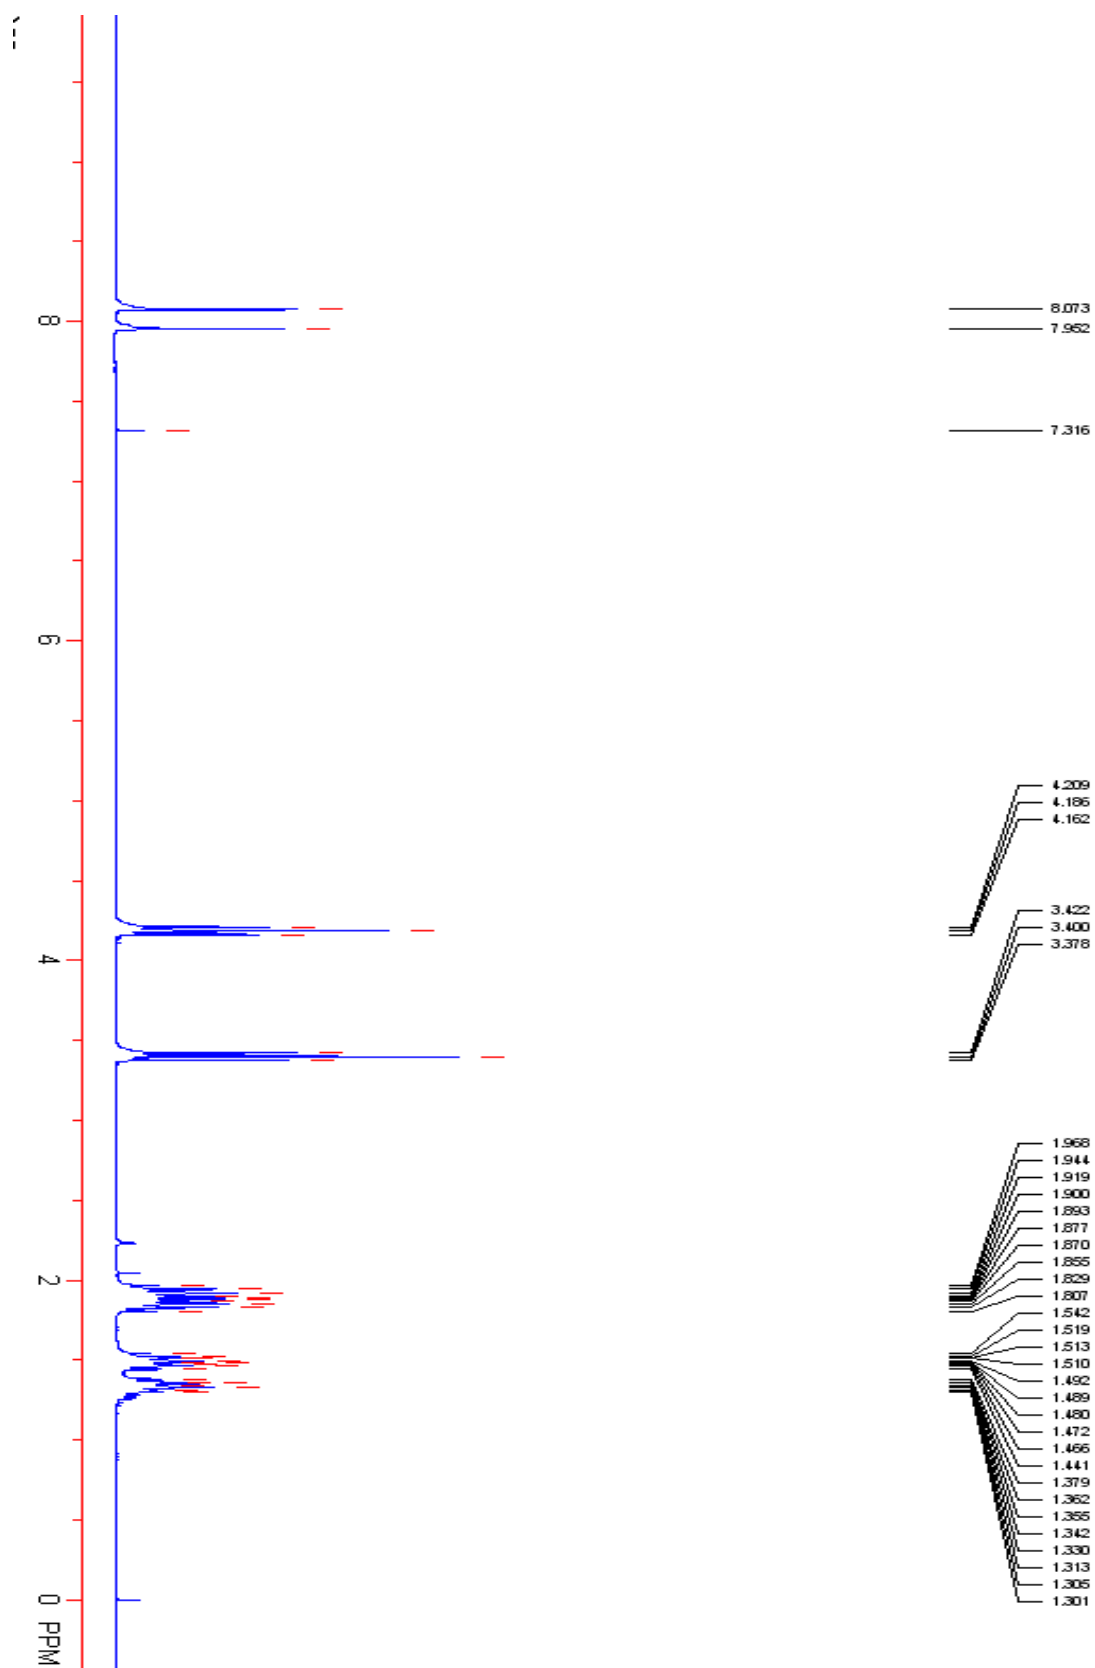

## Compound 9

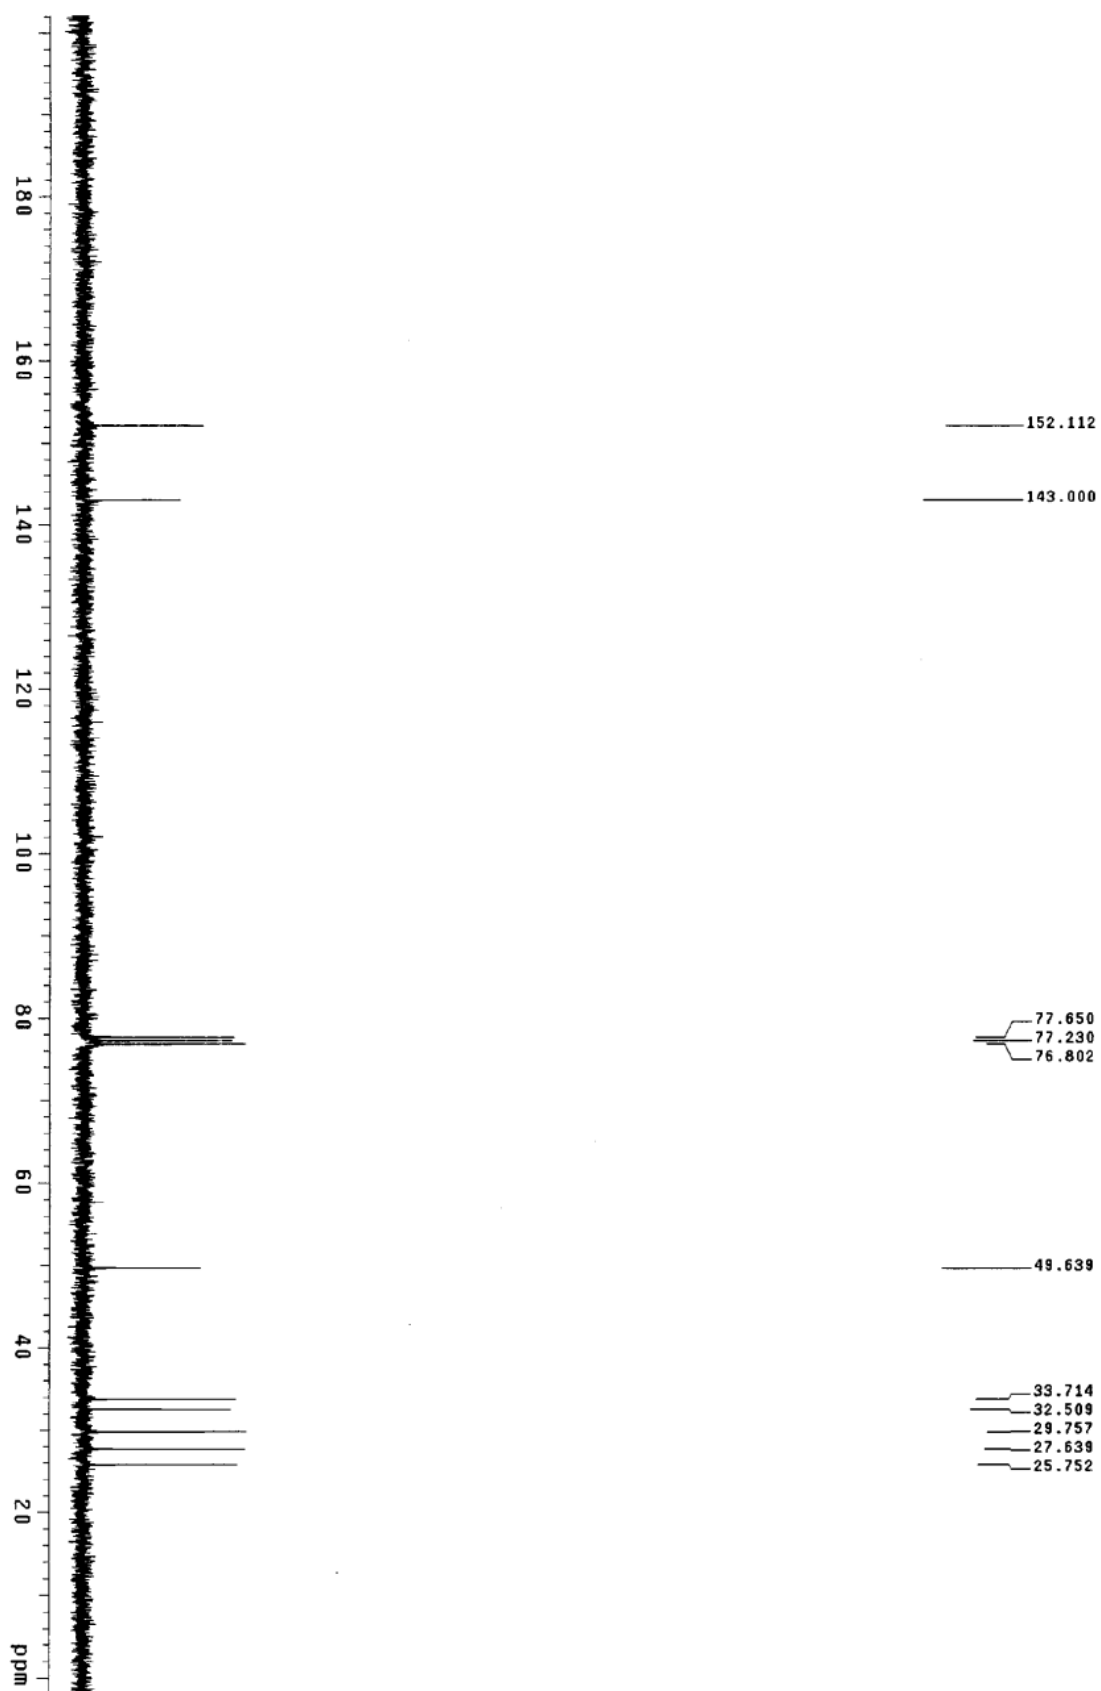

Compound sFOH

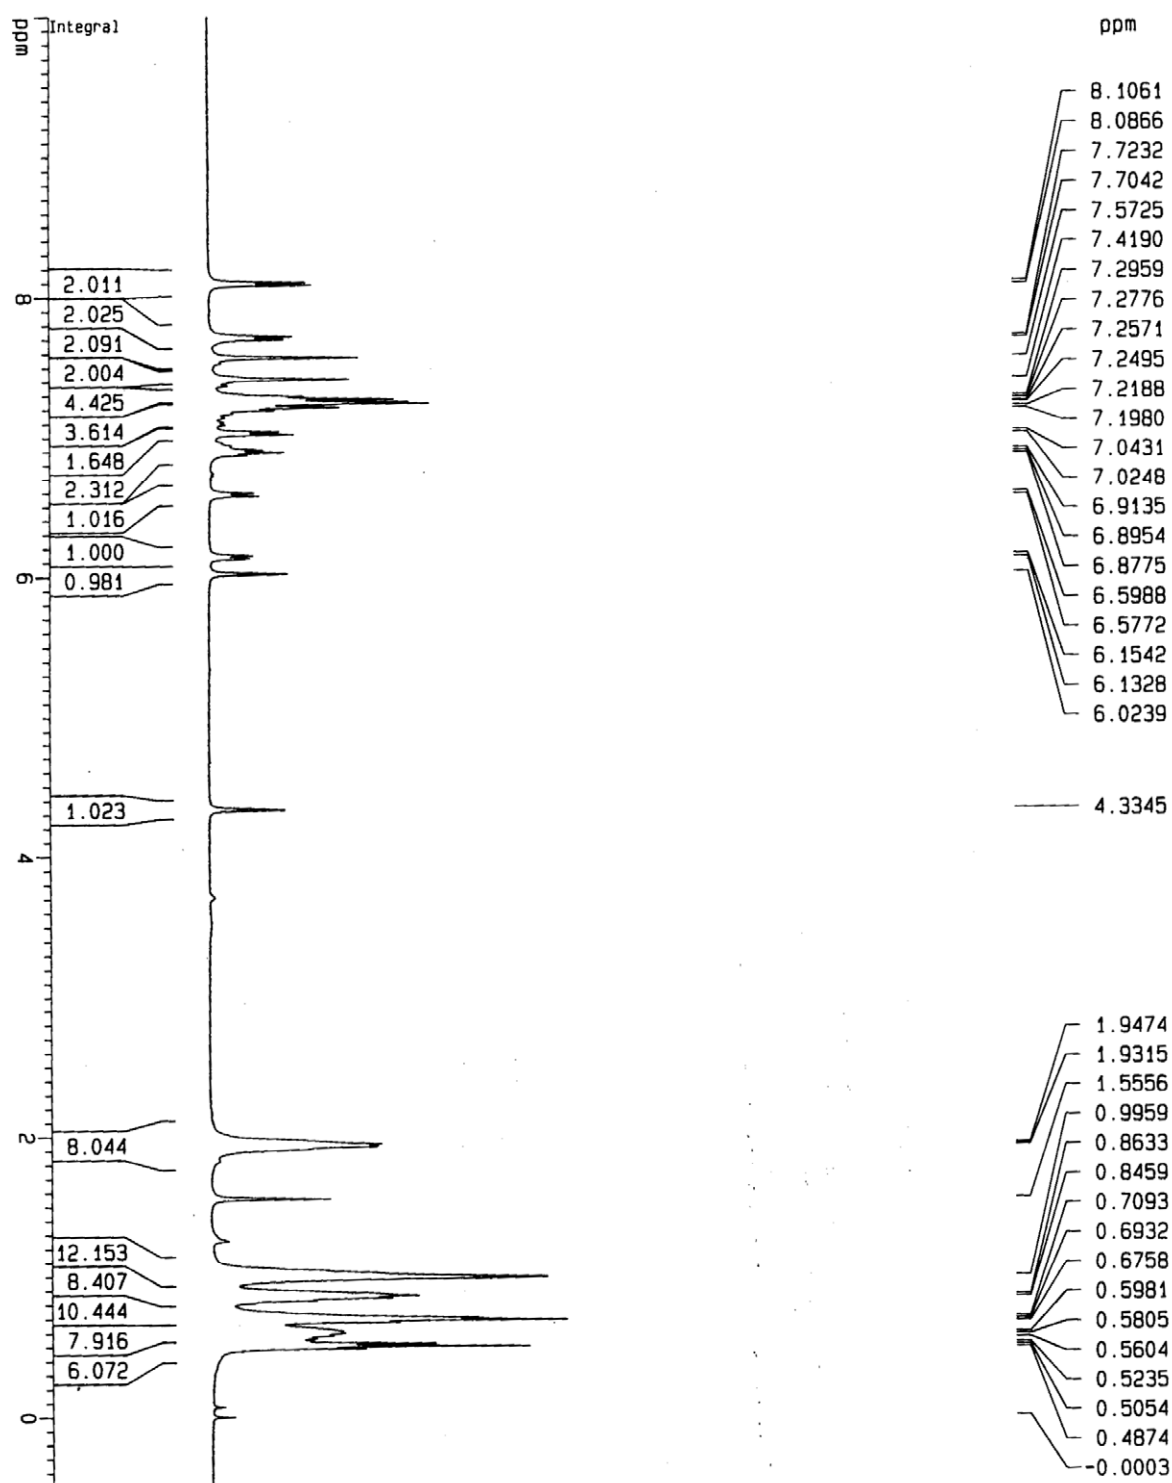

Compound sFOH

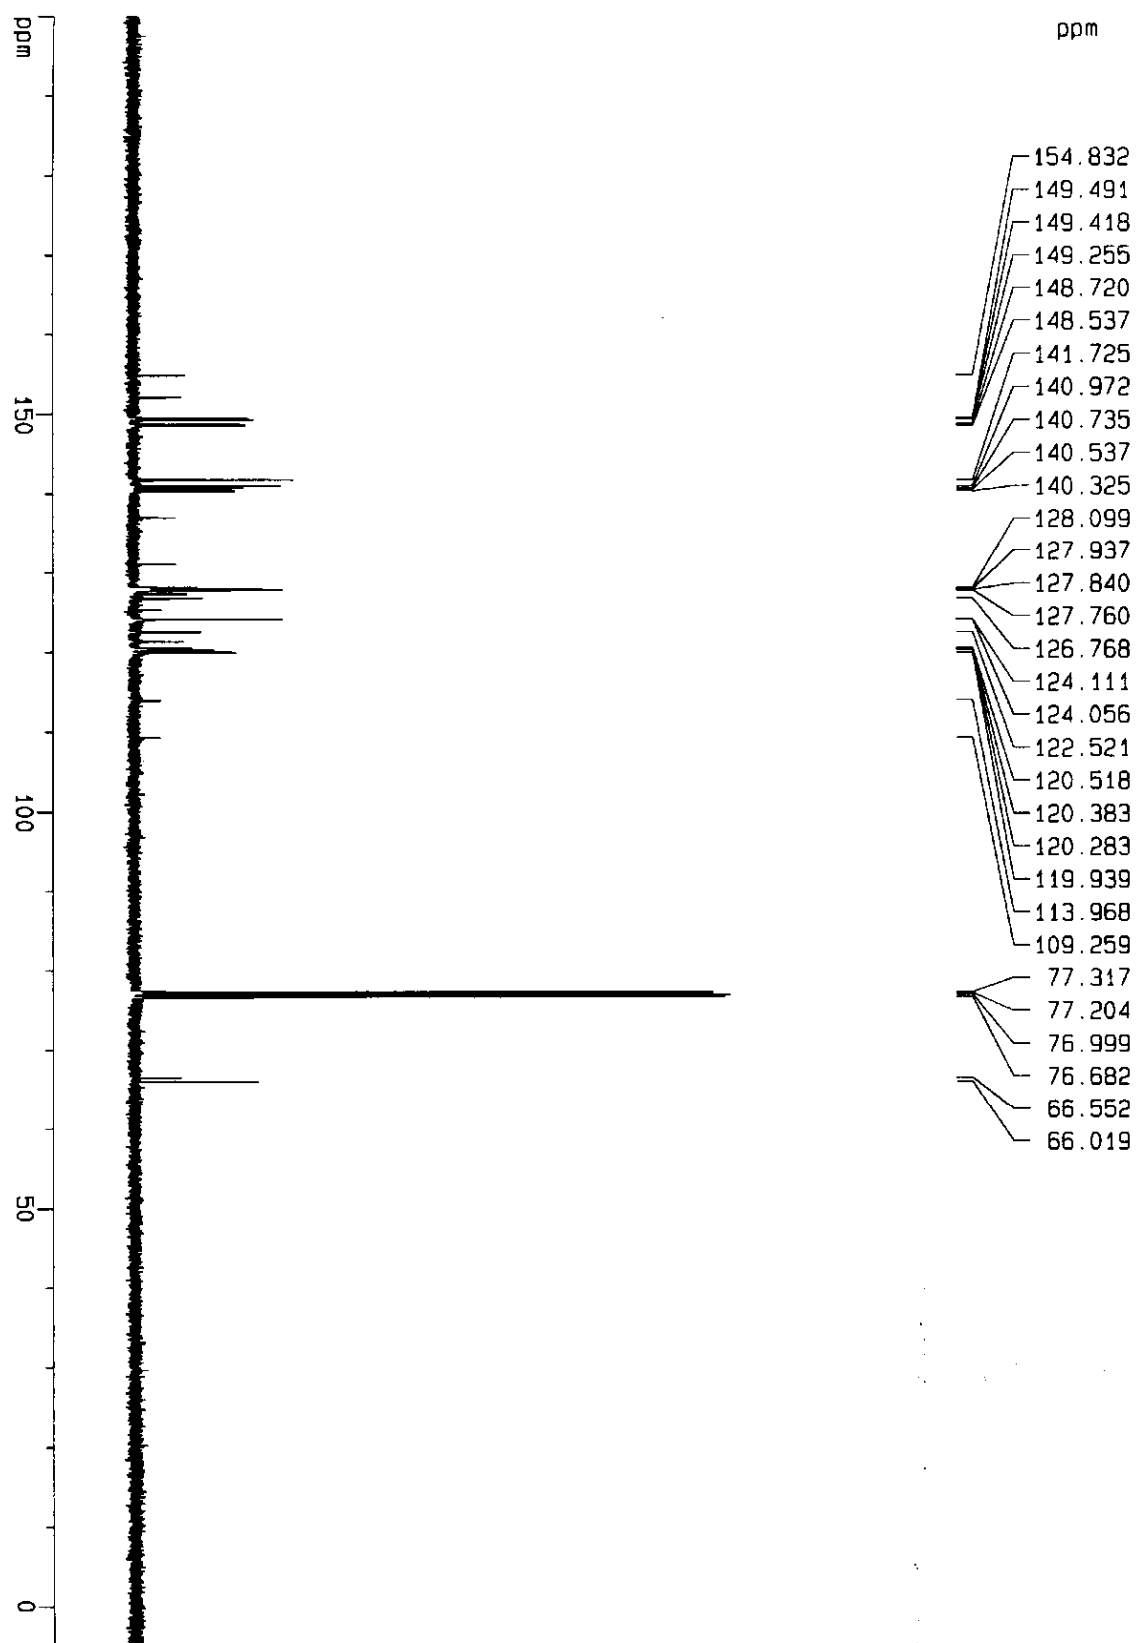

### Compound FOH

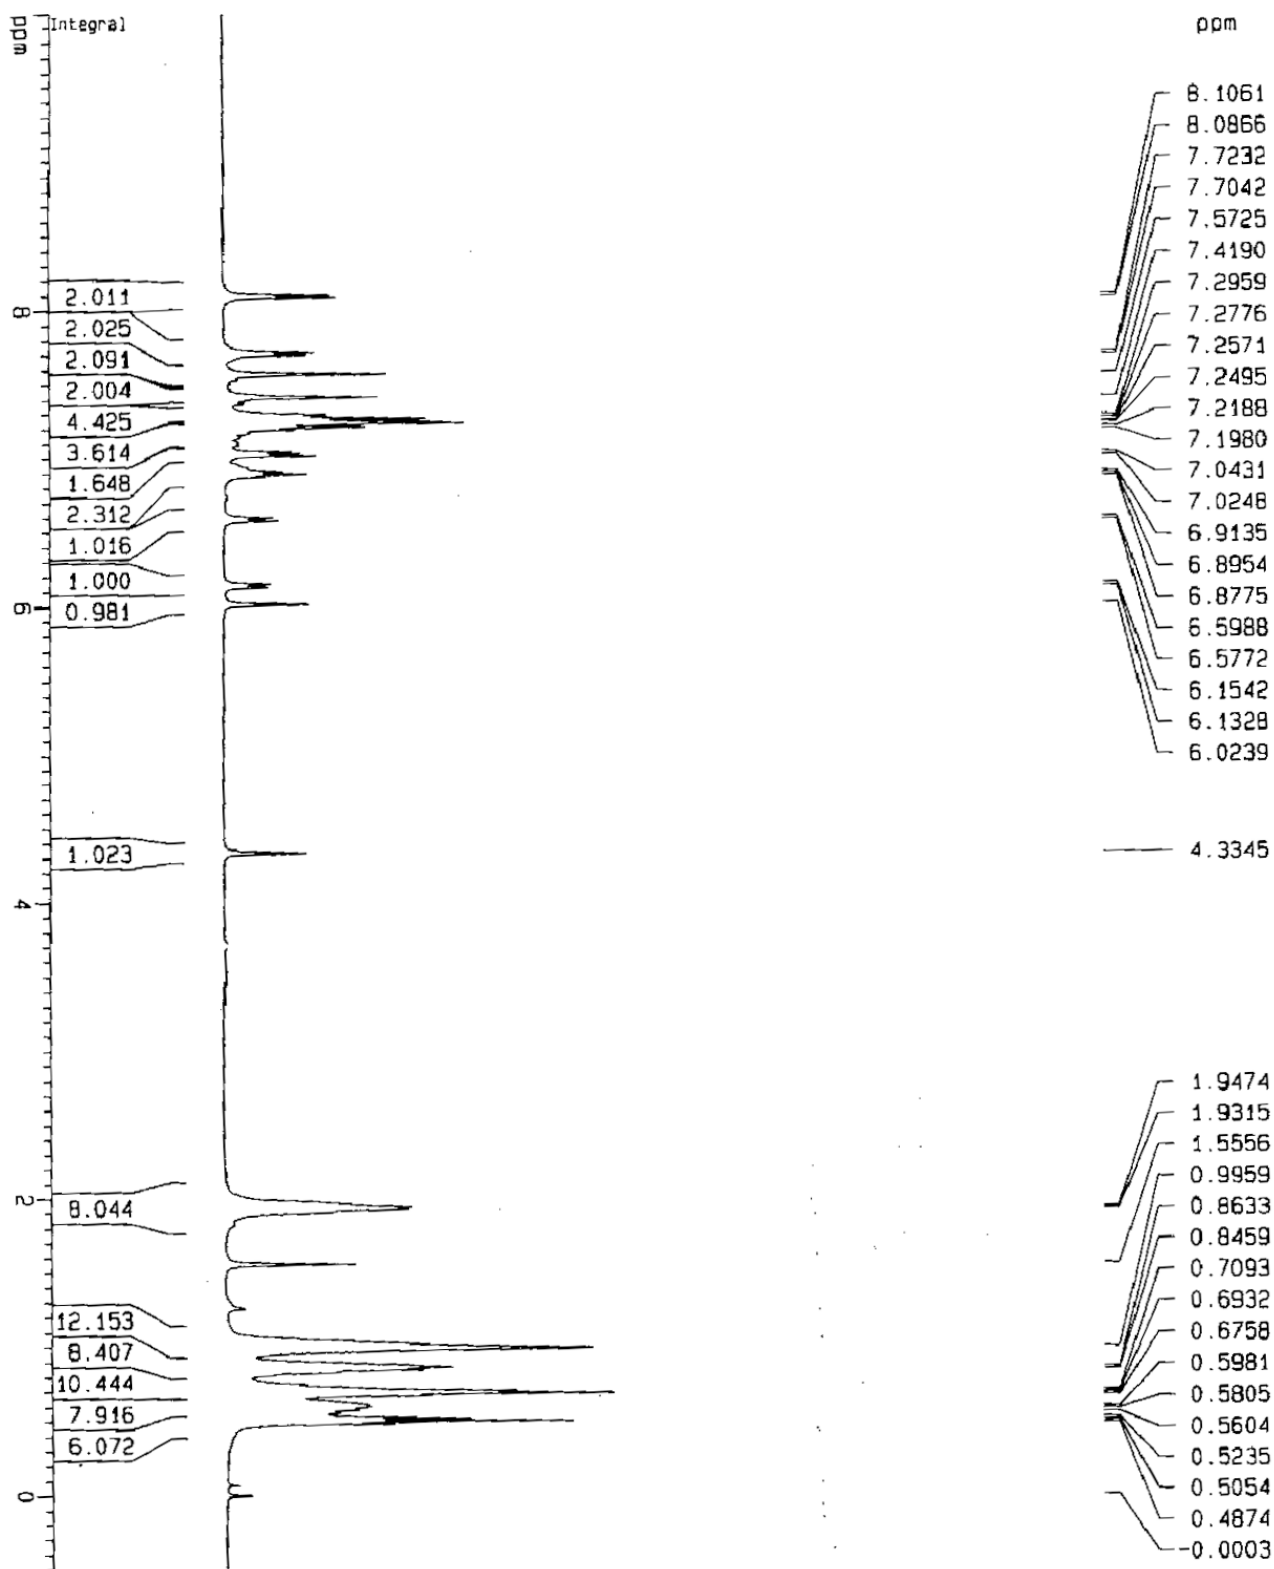



Compound **FOH**

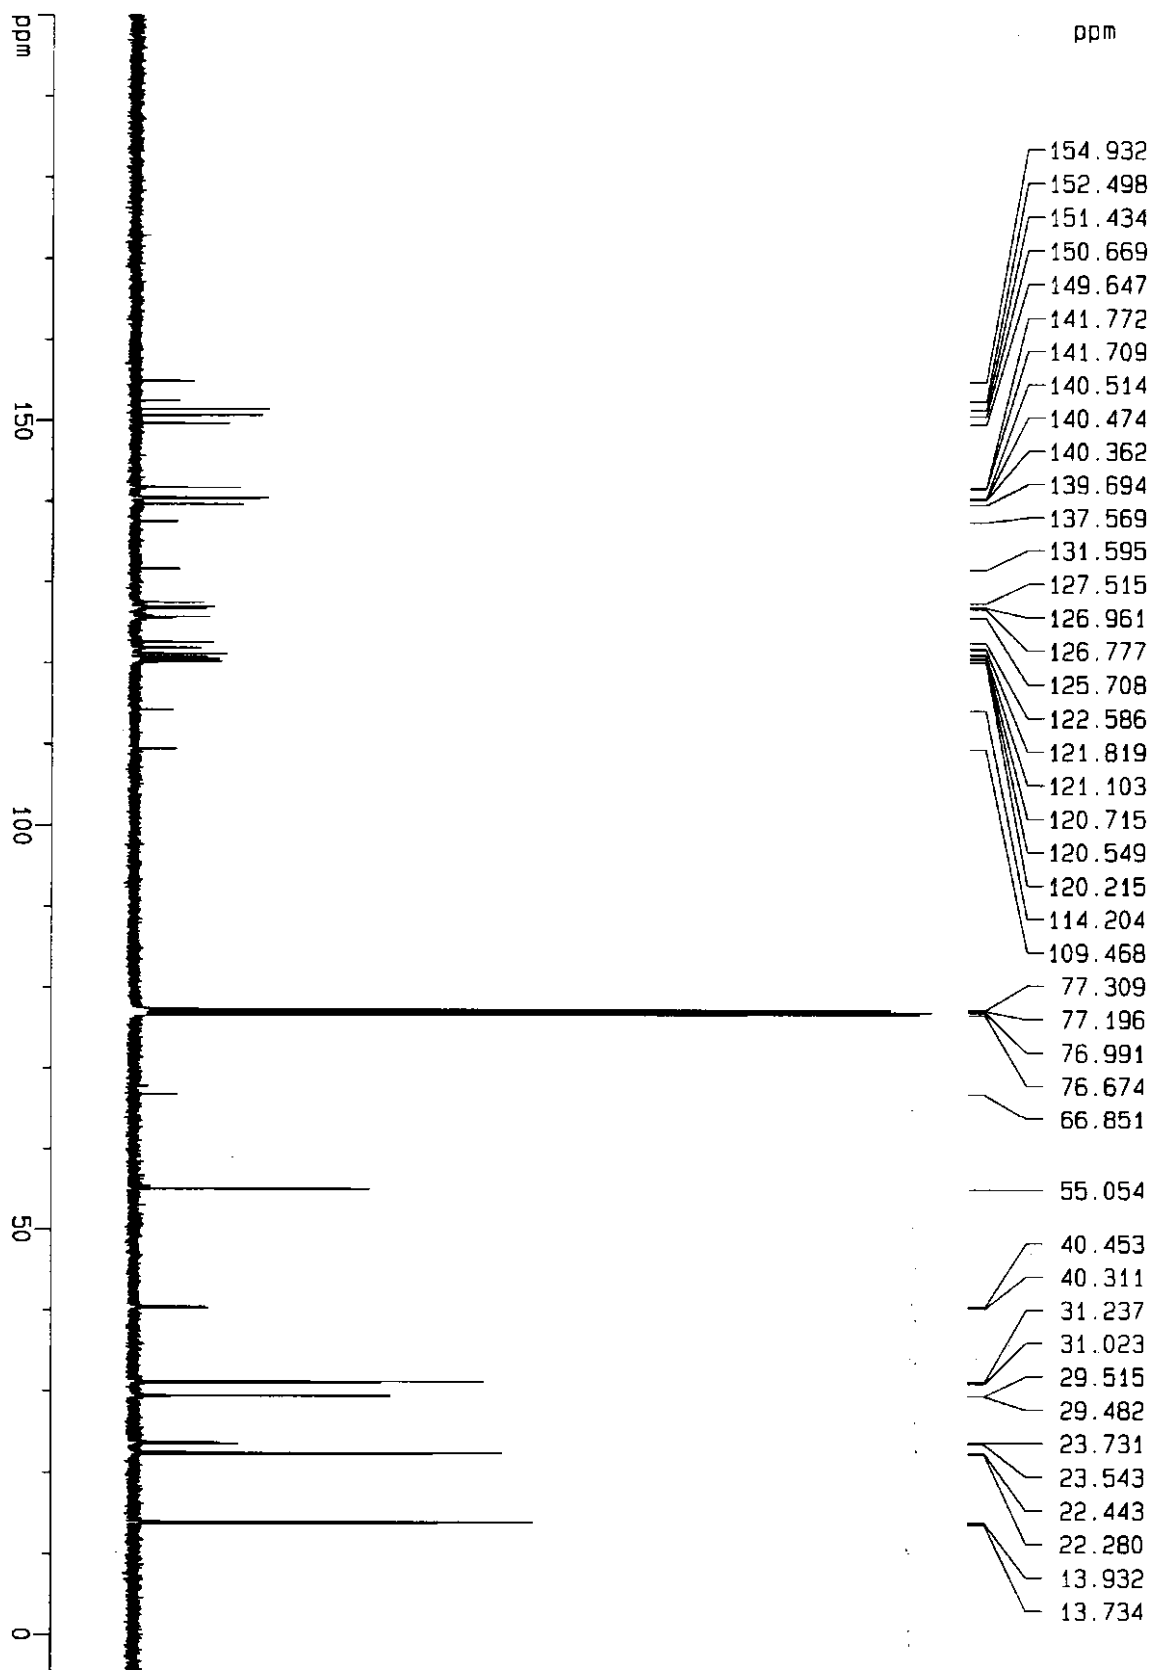

Compound sFCbz

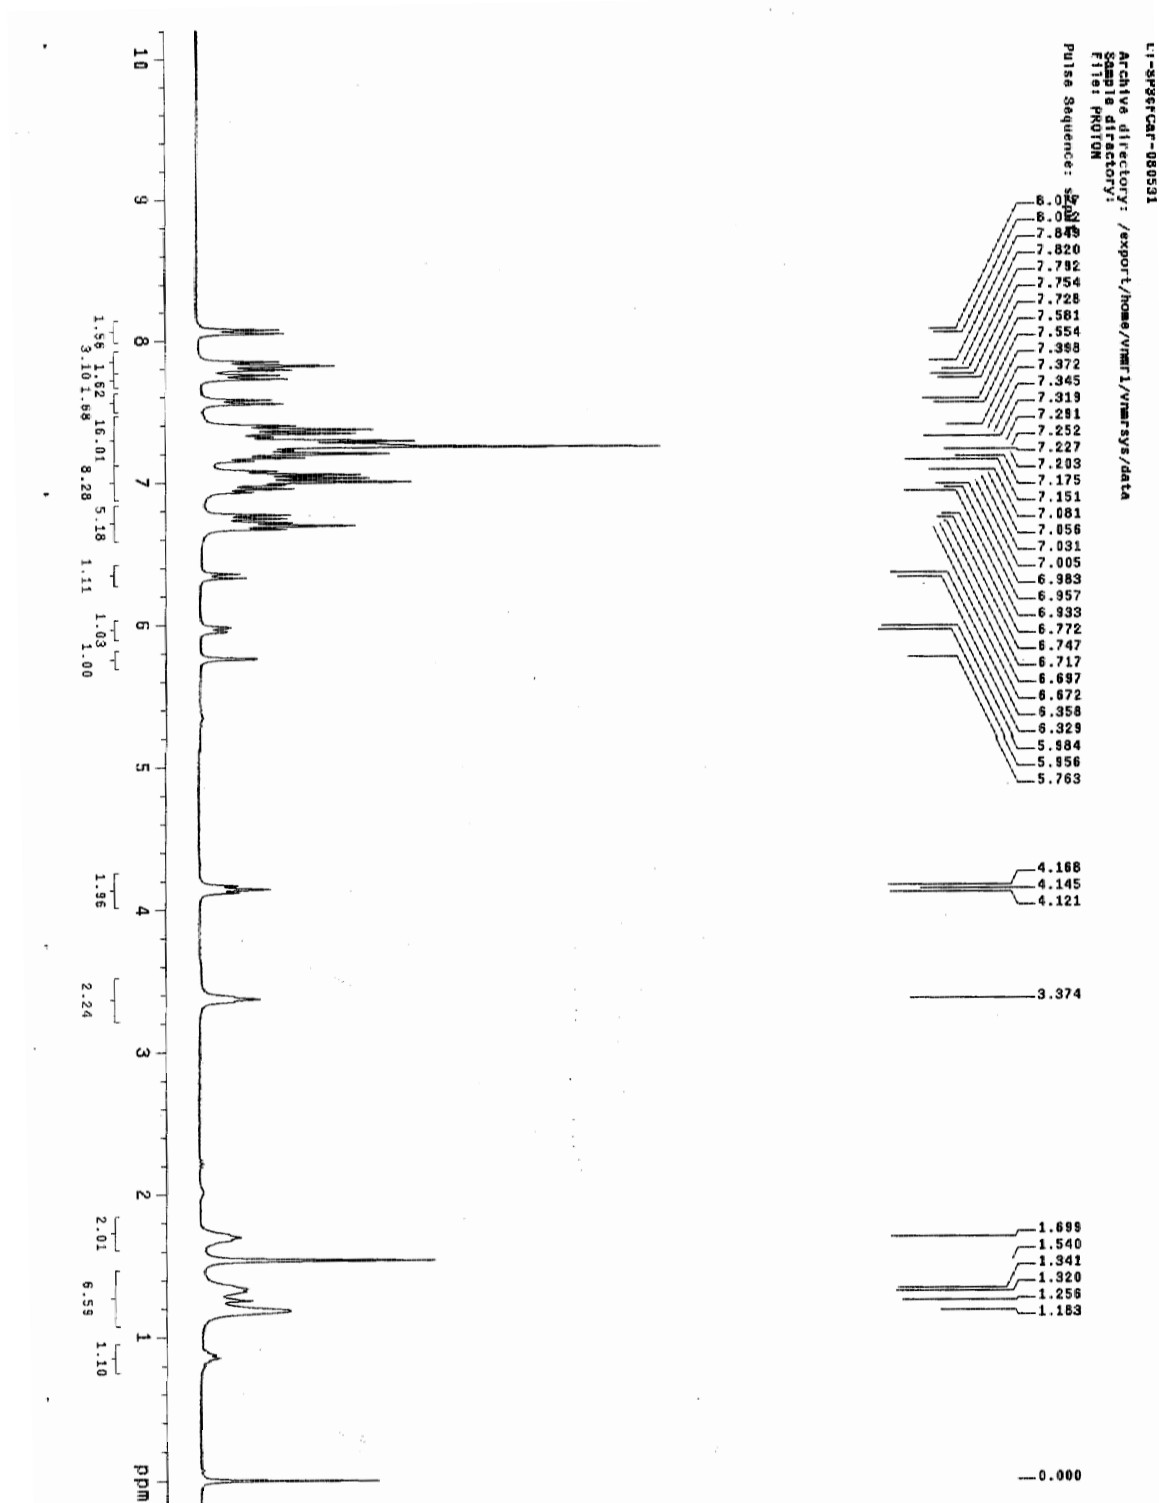

Compound **sFCbz**

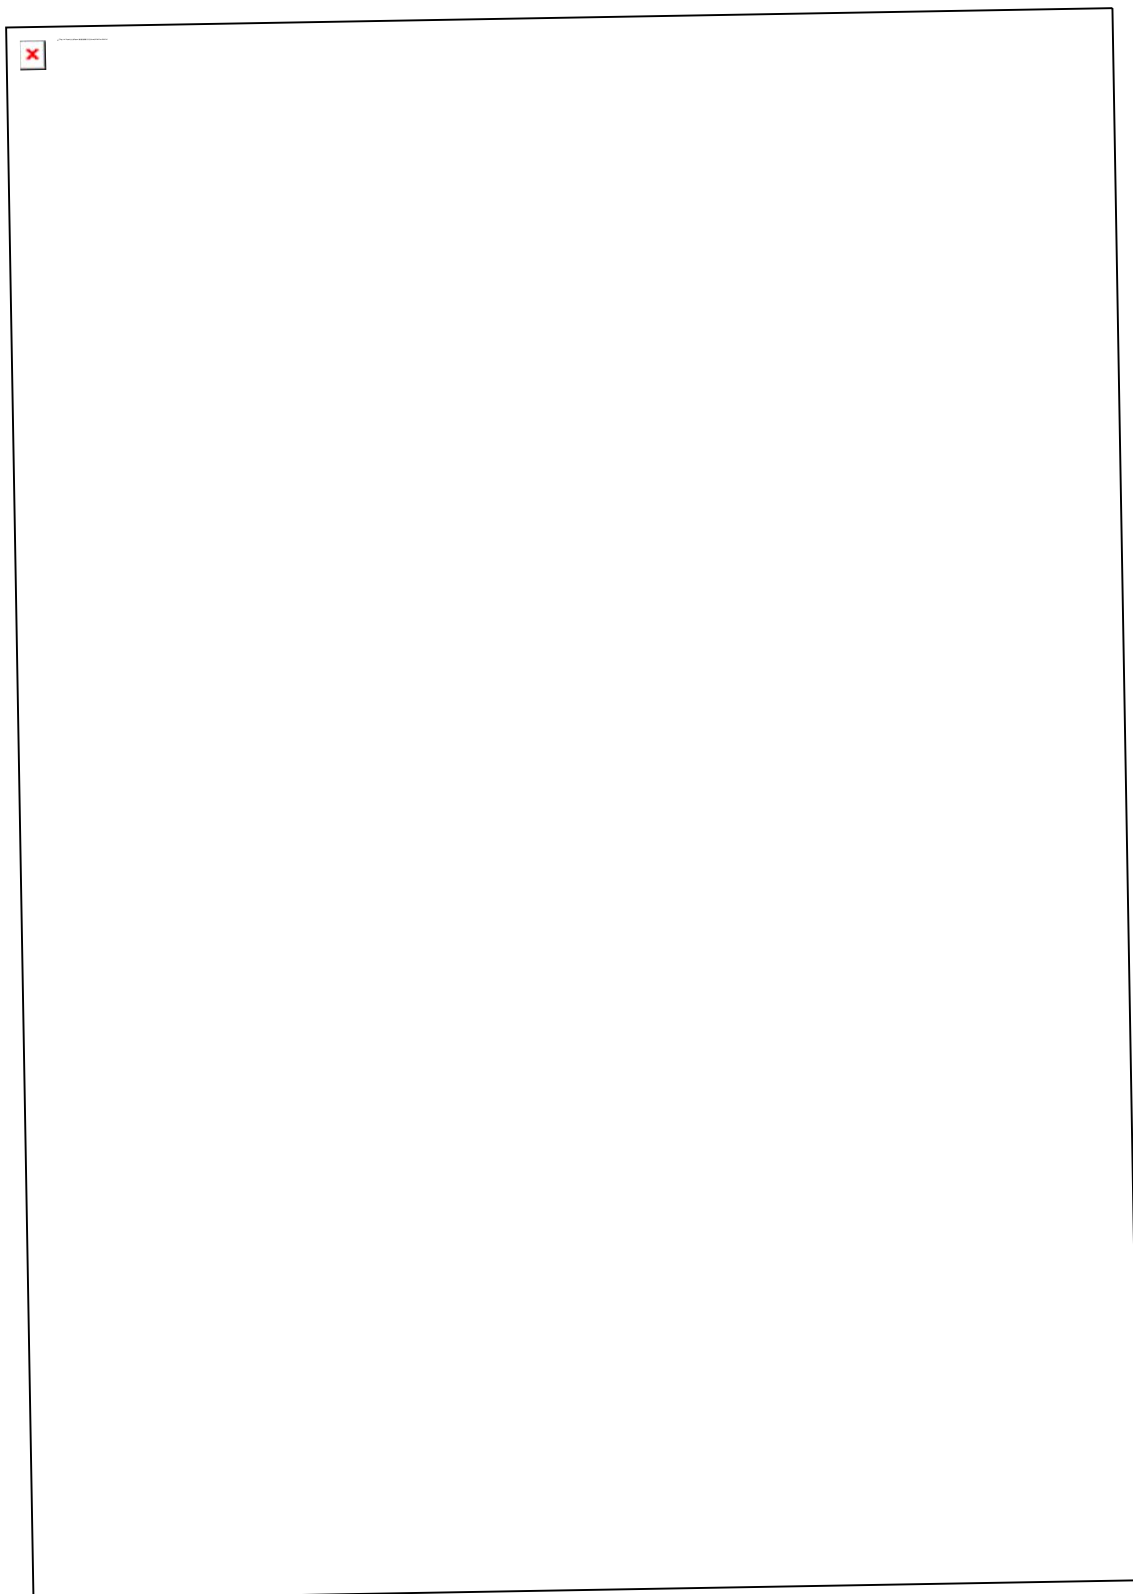

### Compound sFTaz

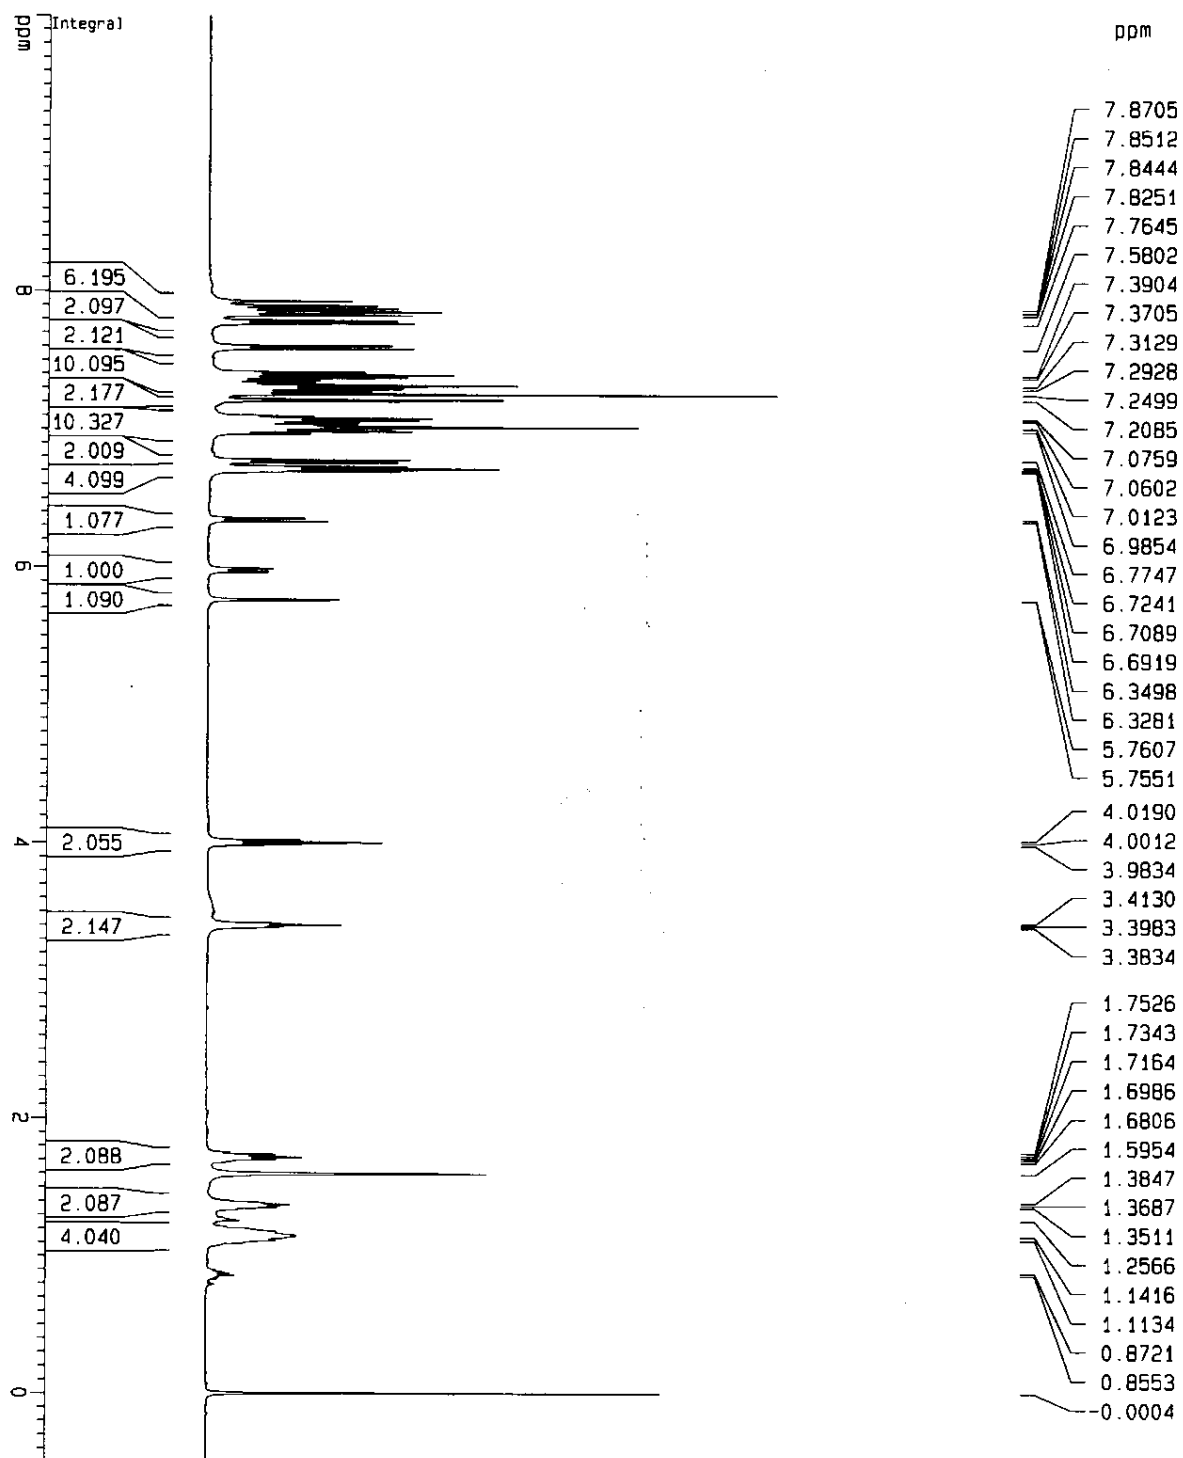

Compound **sFTaz**

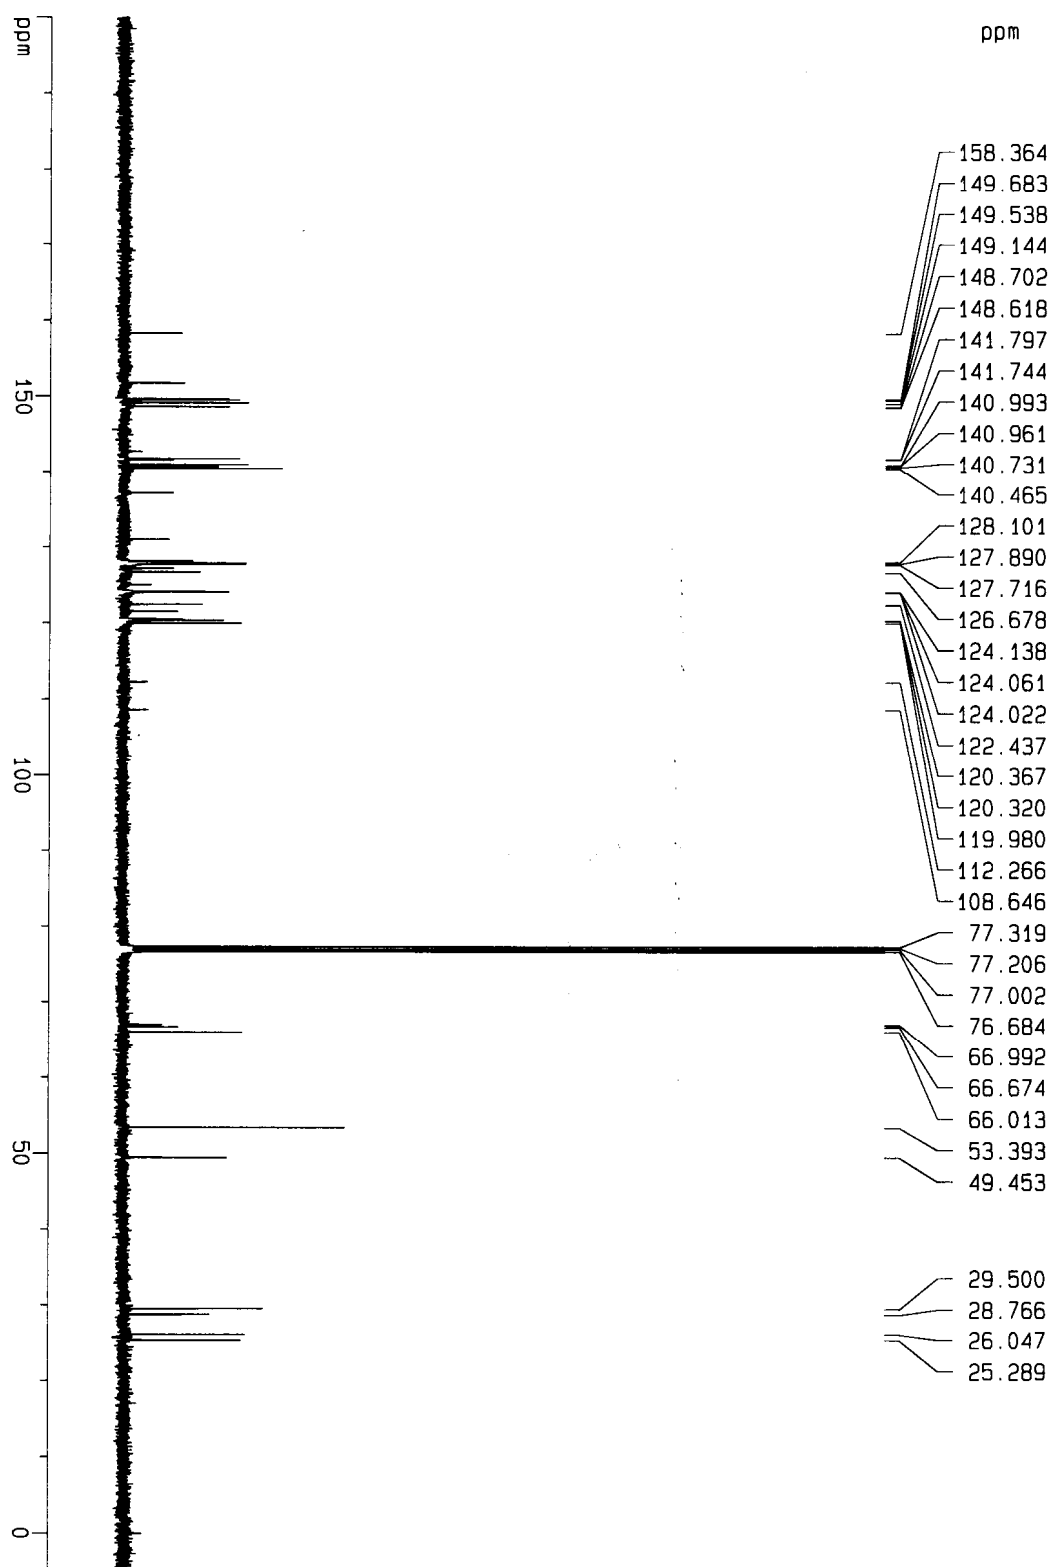

Compound sFOxd

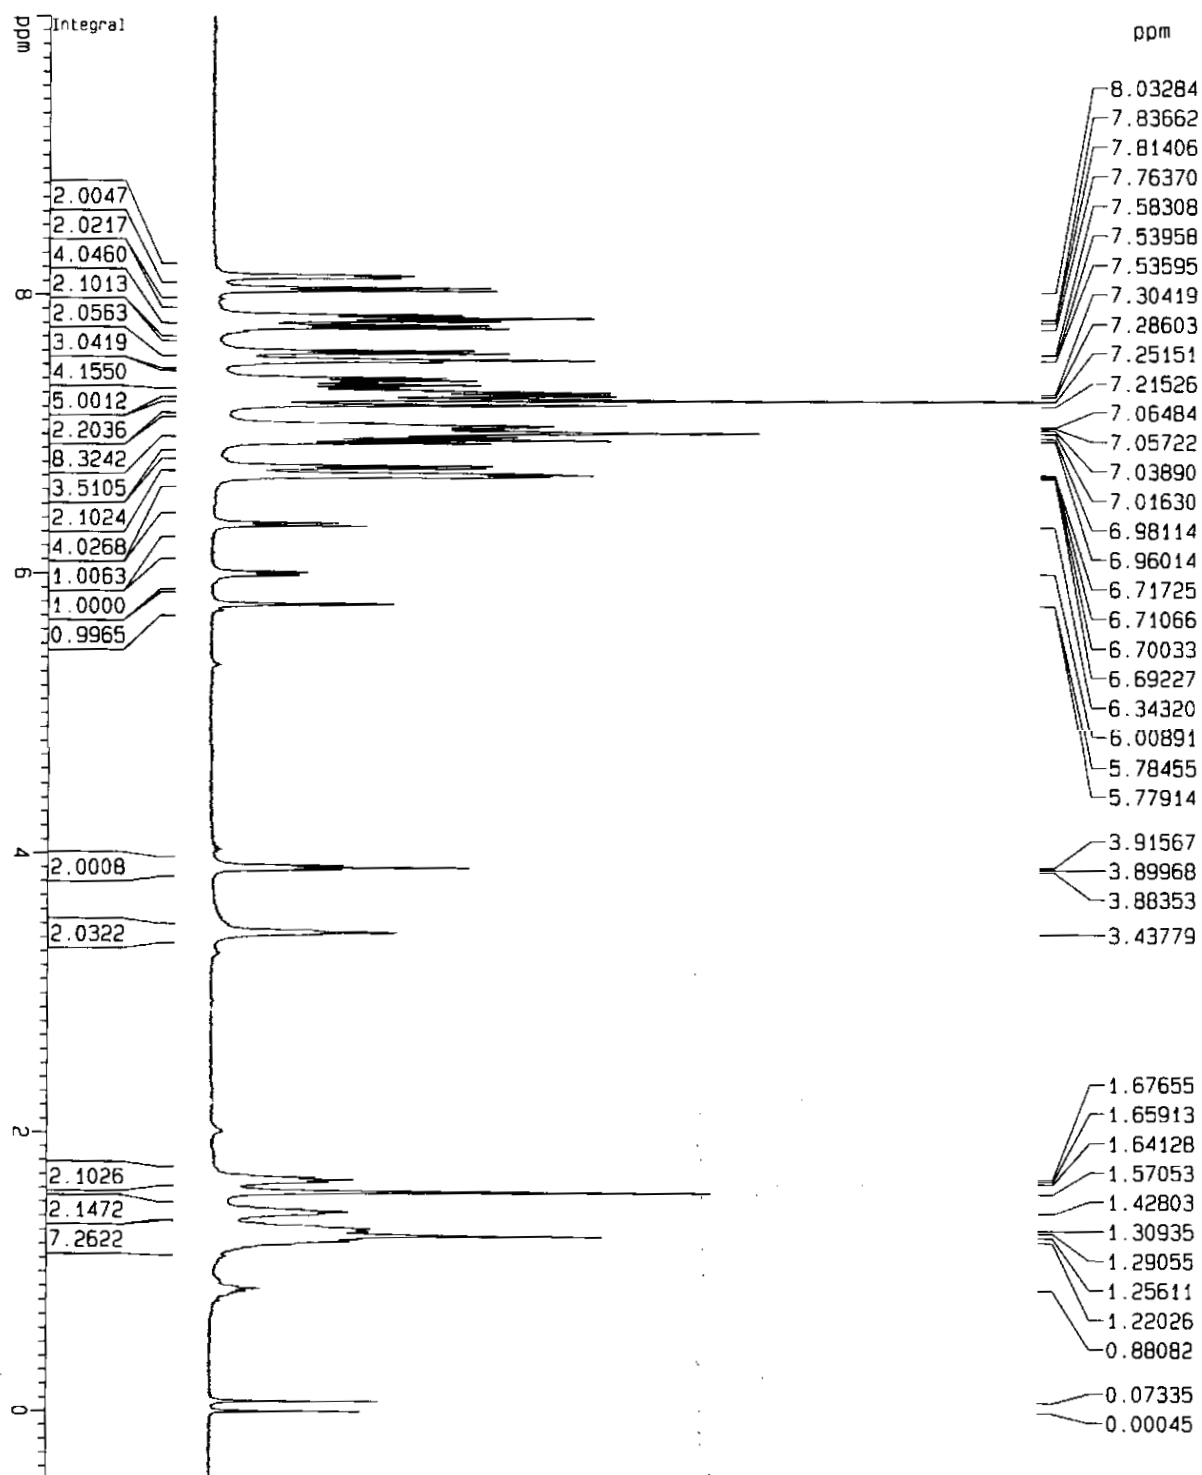



Compound sFOxd

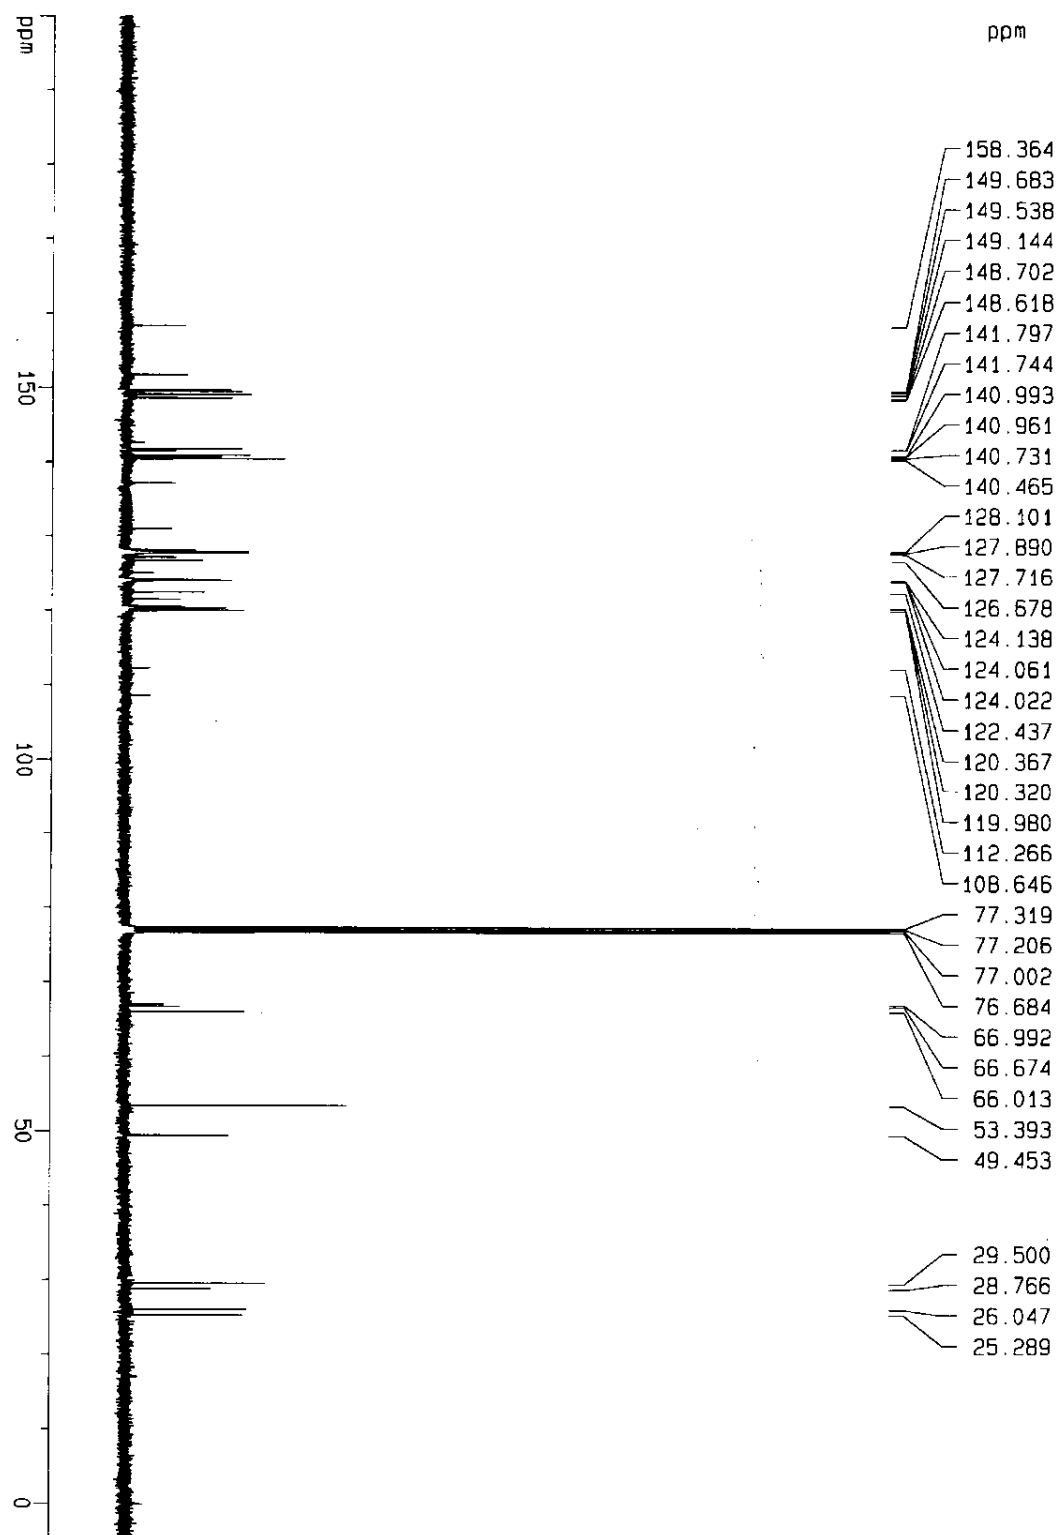

Compound **FCbz**

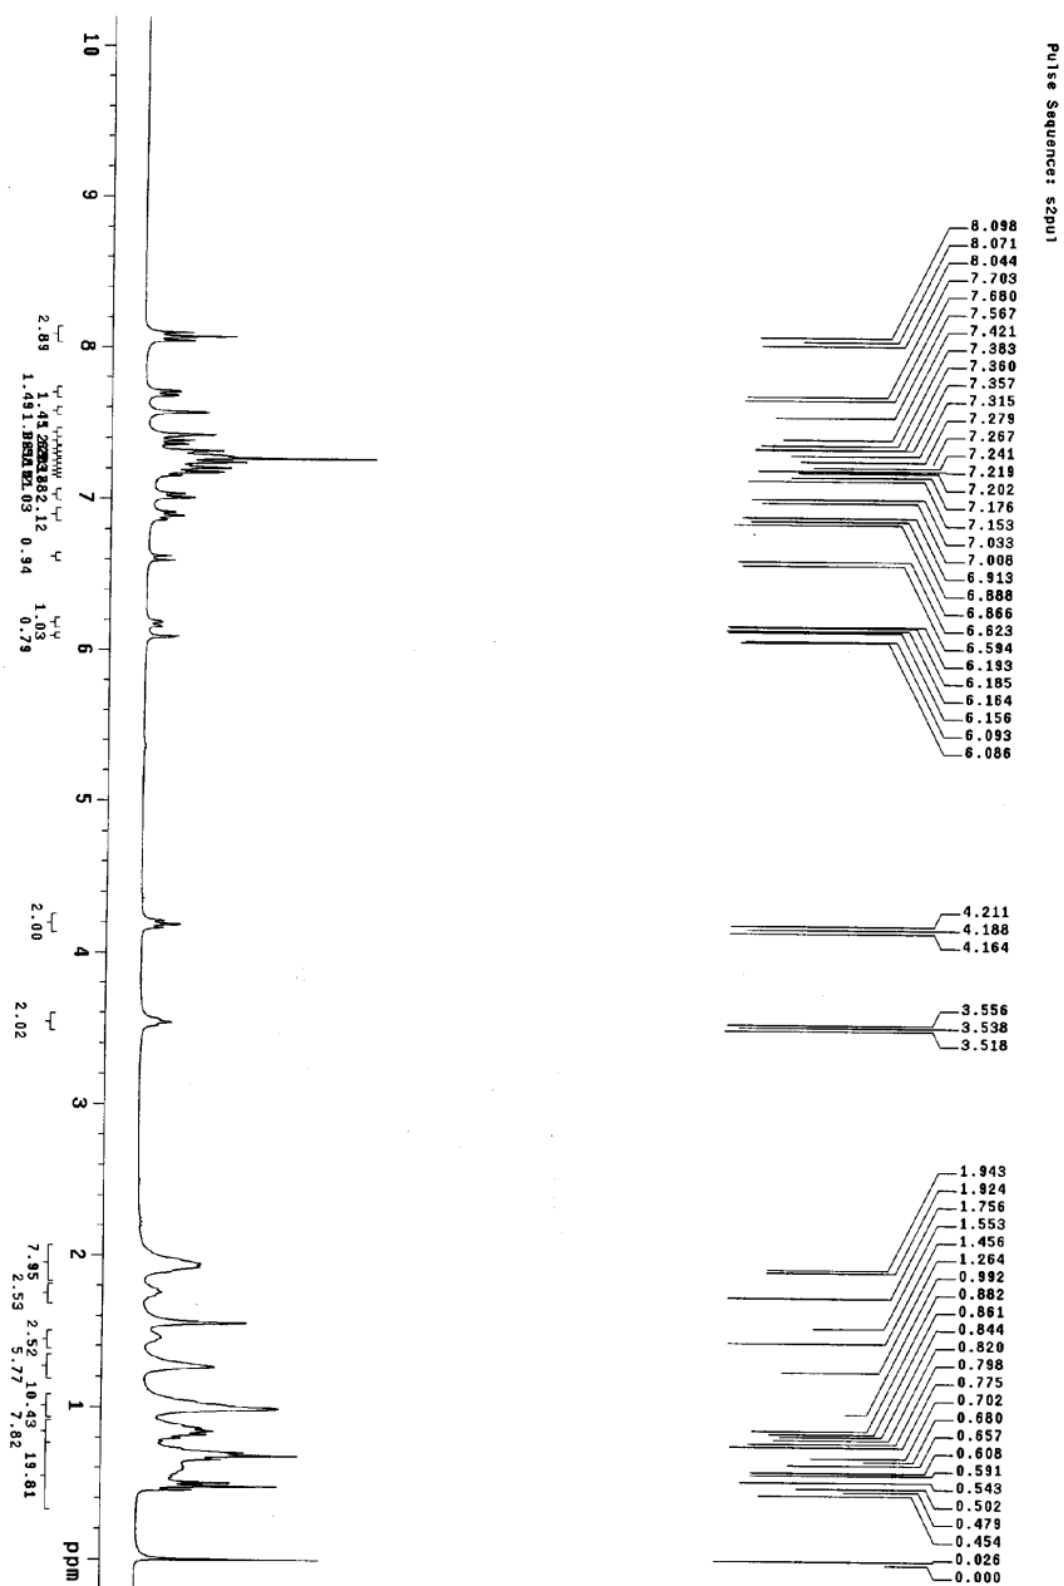

Compound FCbz

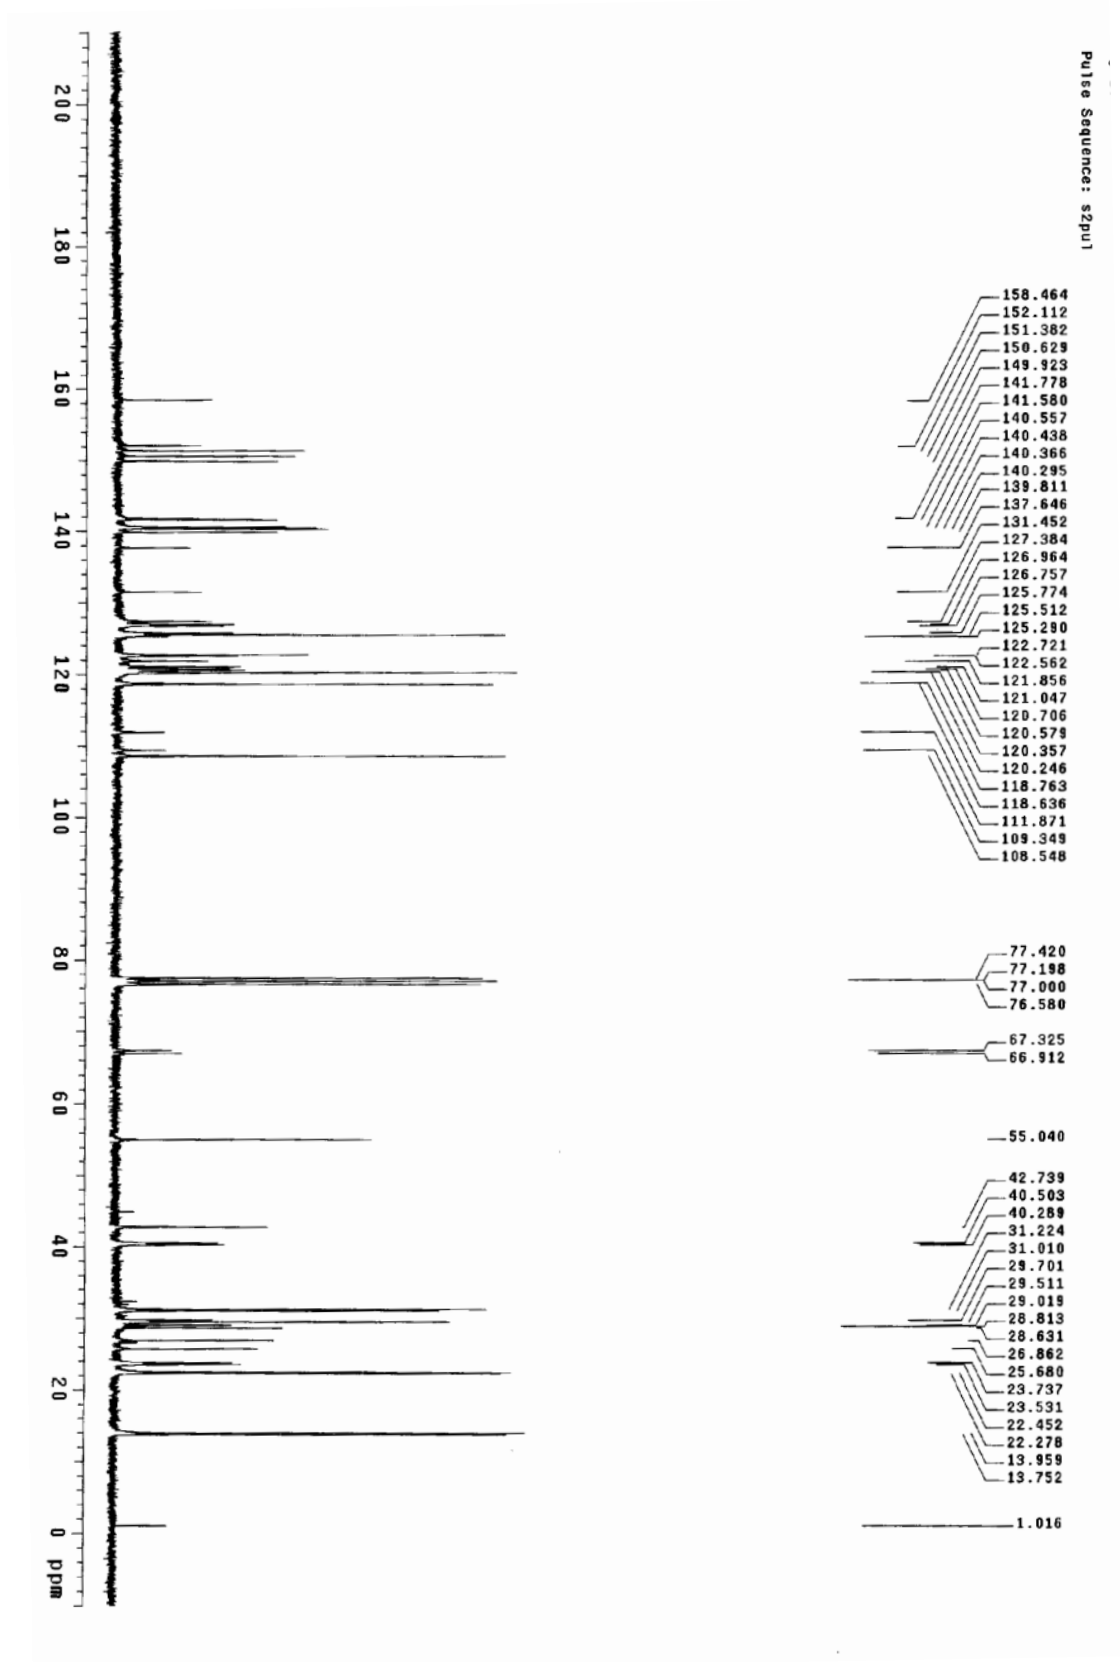

Compound FTaz

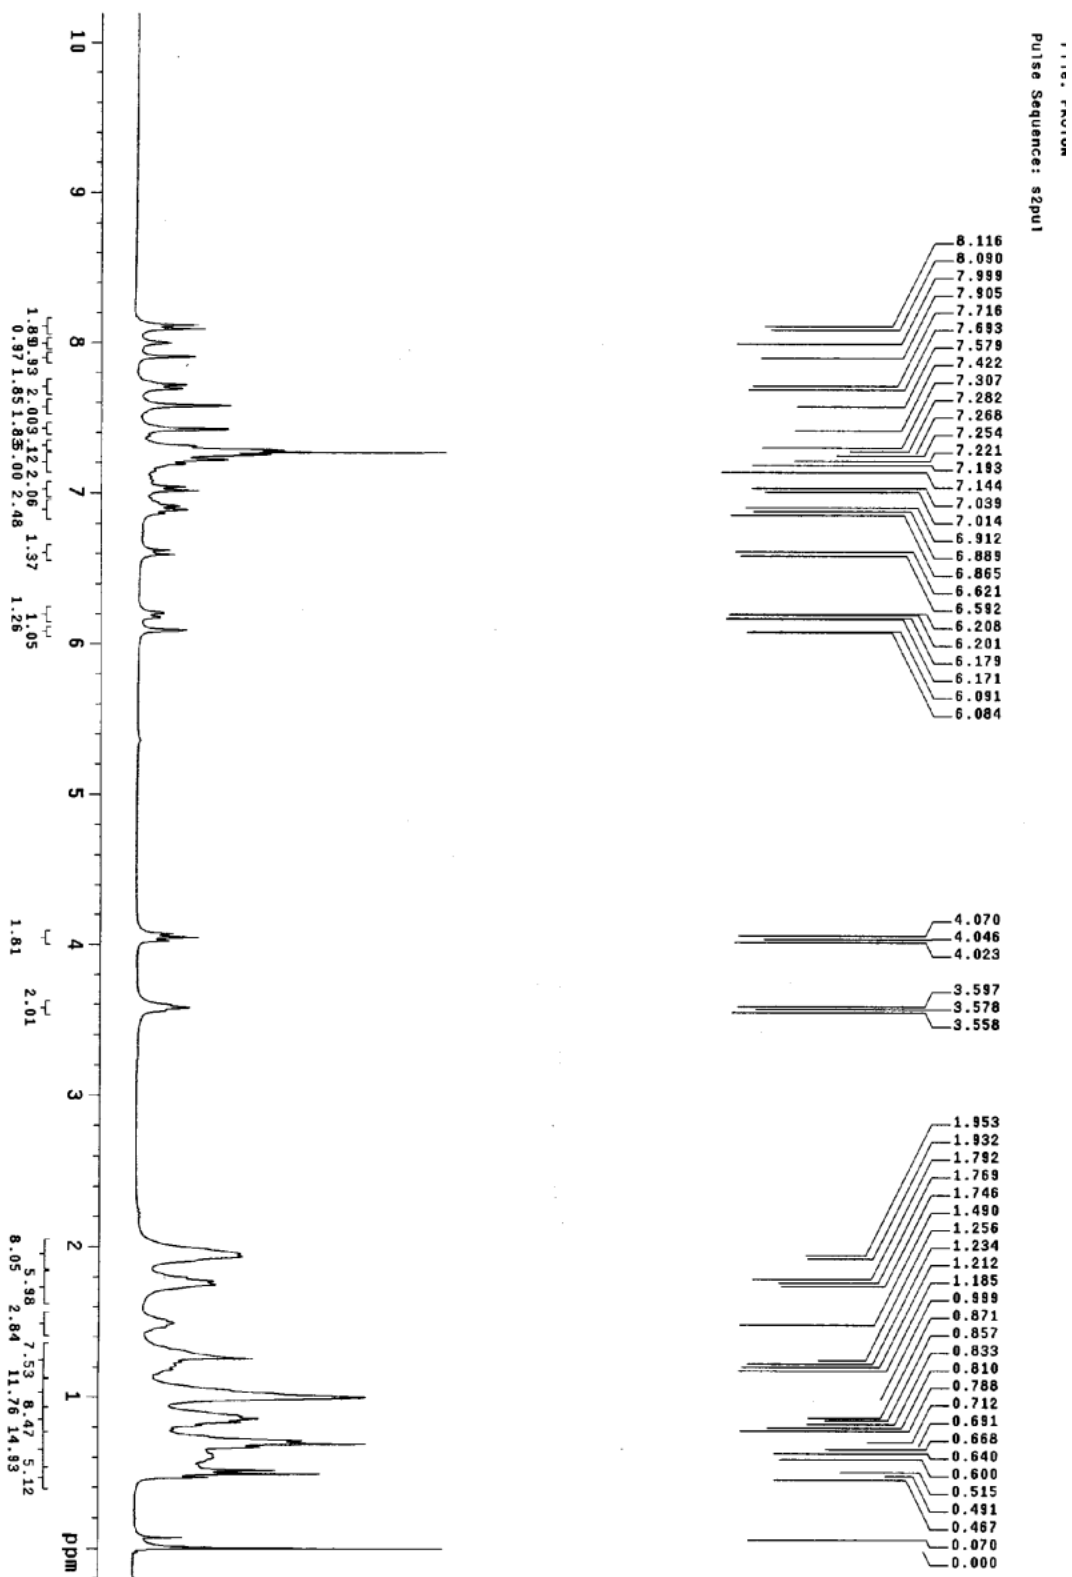

Compound FTaz

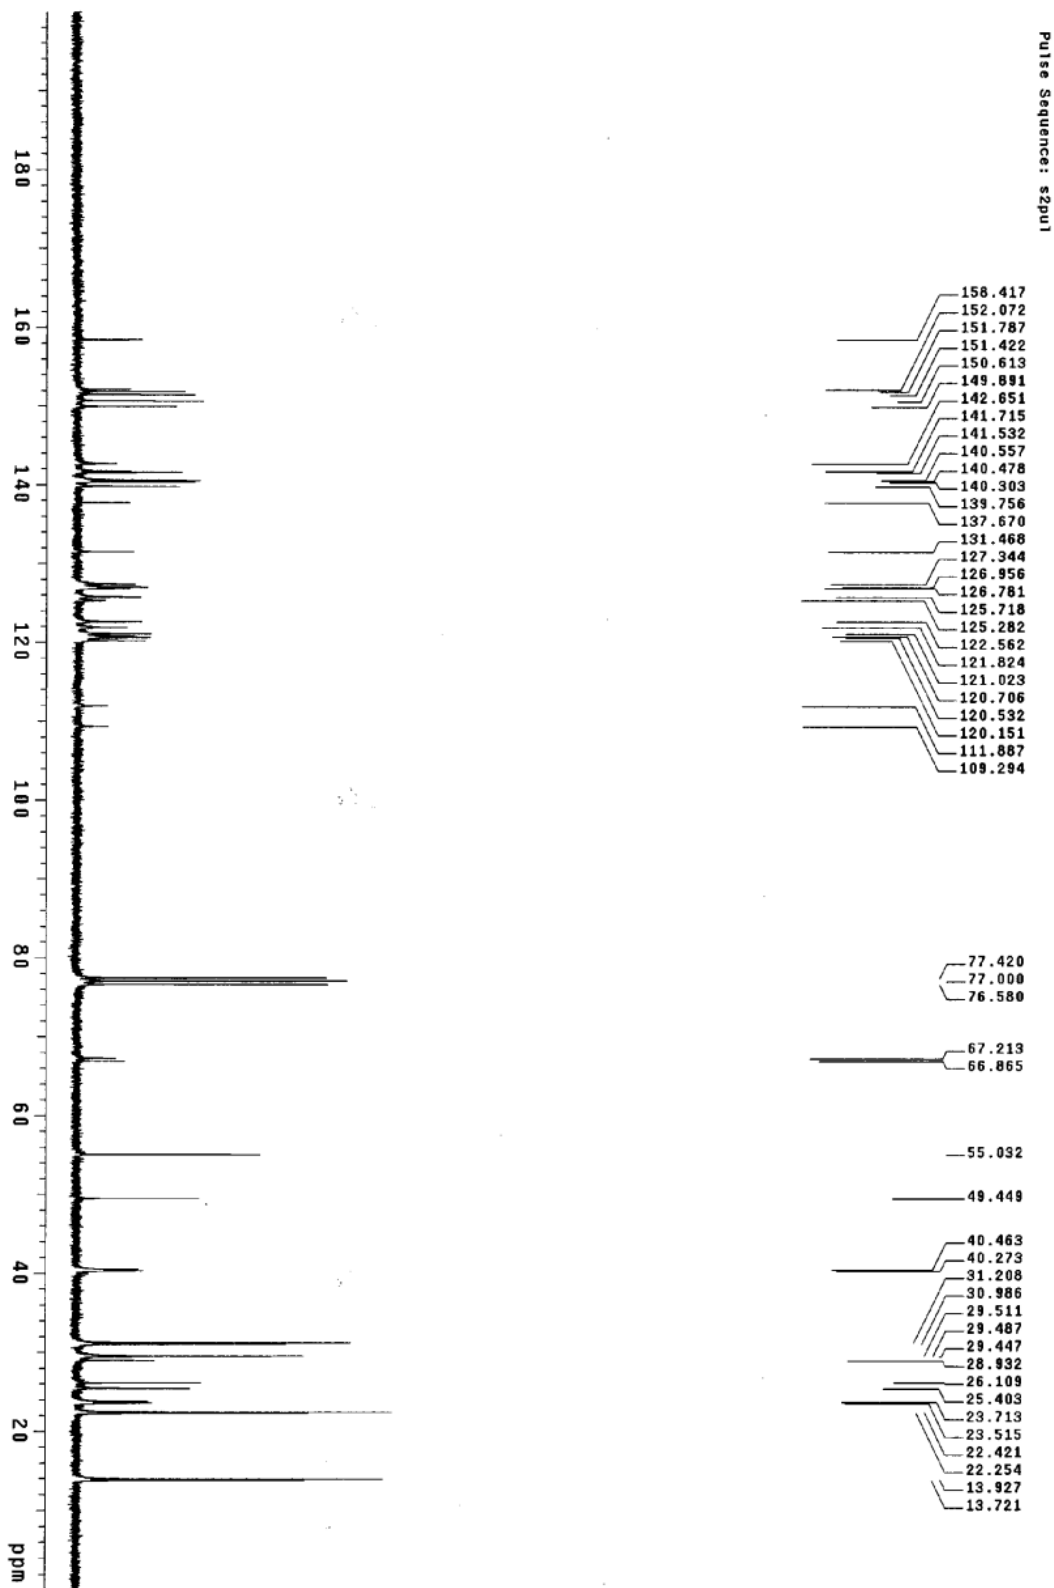

### Compound FOxd

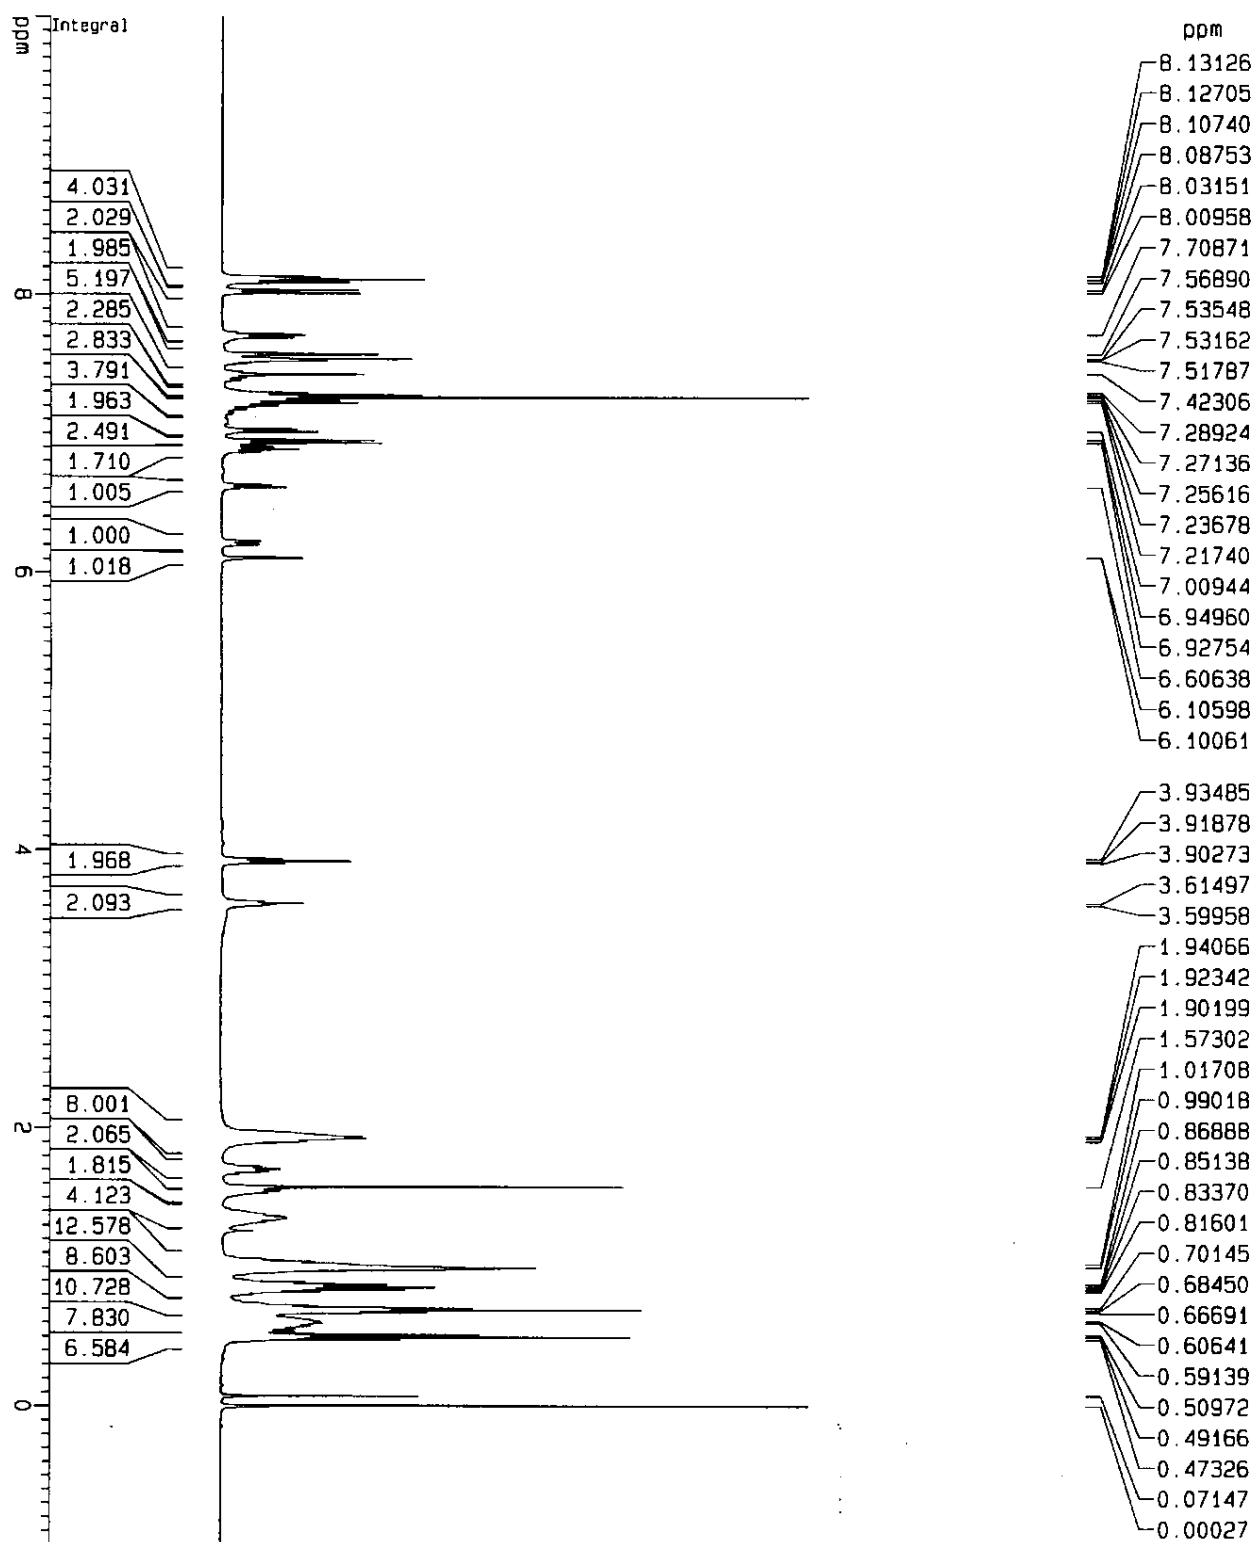

### Compound FOxd

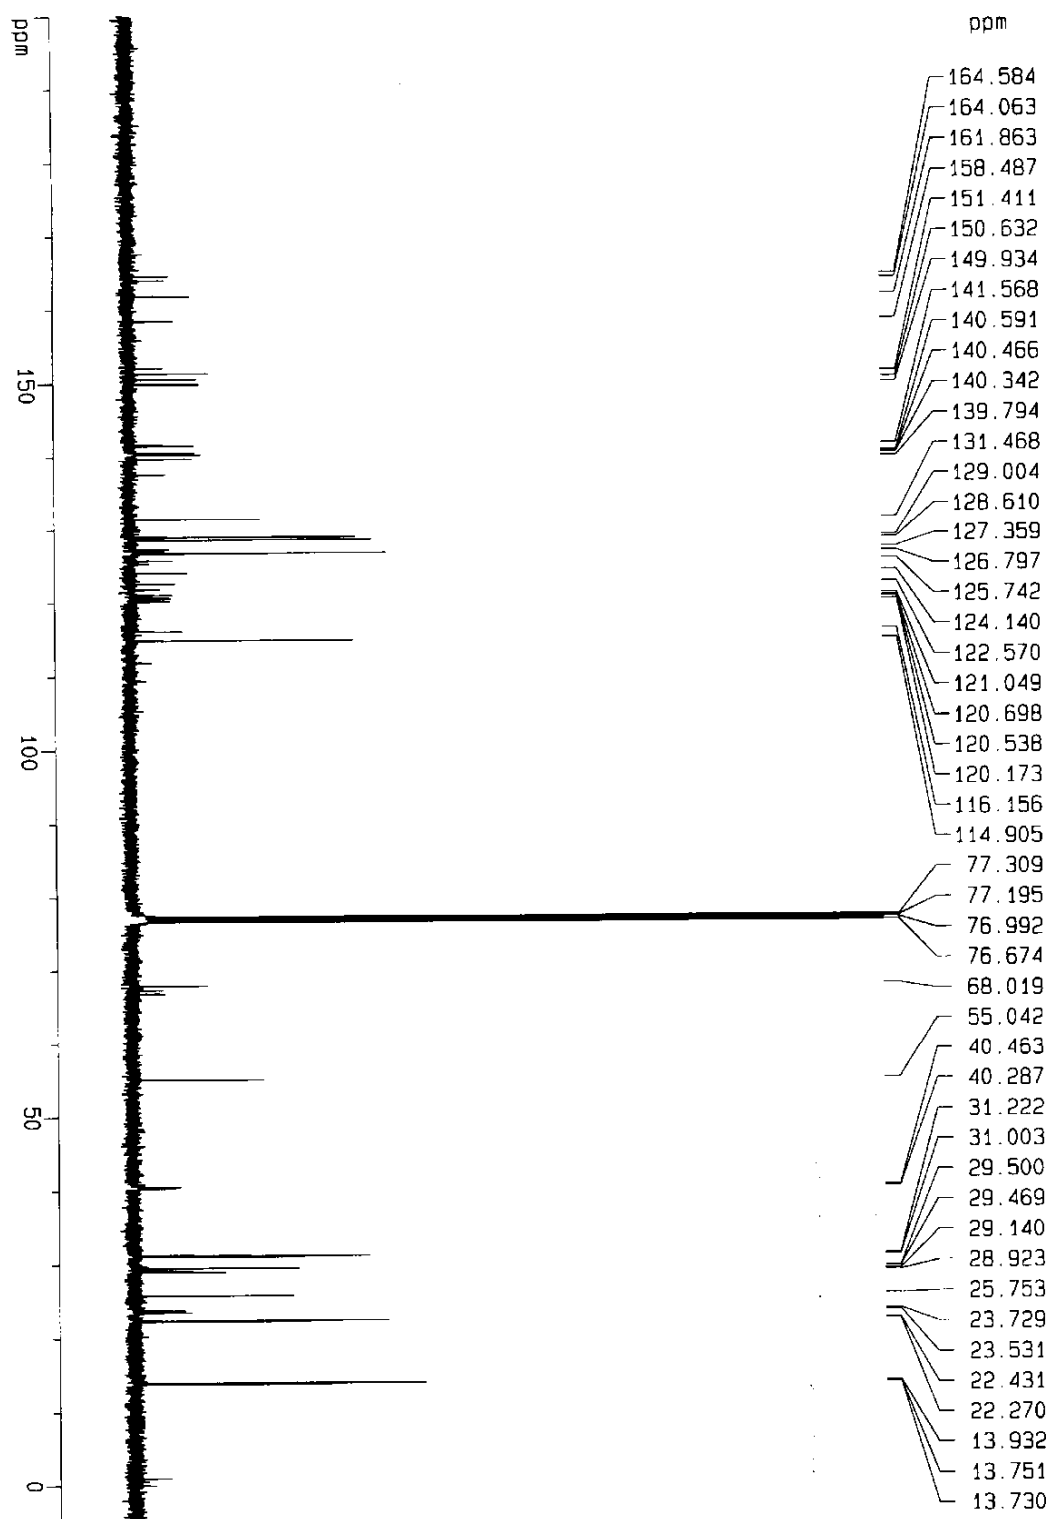

Supplement: b9nj00723g.pdf [file b9nj00723g.pdf]
